# Supplementary material for: Discovery of New Quinolone-Based Diarylamides as Potent B-RAFV600E/C-RAF Kinase Inhibitors Endowed with Promising In Vitro Anticancer Activity
Source: MDPI journal article supplement (doi:10.3390/ijms24043216), 2023-02-06
Supplement: s1 [file s1]

## Supporting Information

### Discovery of new quinoline-based diarylamides as potent B-RAF<sup>V600E</sup>/C-RAF kinase inhibitors endowed with promising in vitro anticancer activity

*Hyun Ji Kim<sup>1</sup>, Jung Woo Park<sup>2</sup>, Sangjae Seo<sup>2</sup>, Kwang-Hwi Cho<sup>3</sup>, Mohammed M. Alanazi<sup>4</sup>, Eun-Kyoung Bang<sup>1</sup>, Gyochang Keum<sup>1,5\*</sup>, and Ashraf K. El-Damasy<sup>1\*</sup>*

<sup>1</sup> Center for Brain Technology, Brain Science Institute, Korea Institute of Science and Technology (KIST), Seoul 02792, Republic of Korea; [hjkim926@kist.re.kr](mailto:hjkim926@kist.re.kr) (H.J.K), [eunkbang@kist.re.kr](mailto:eunkbang@kist.re.kr) (E.-K.B.)

<sup>2</sup> Supercomputing Application Center, Div. of National Supercomputing, Korea Institute of Science and Technology Information, 245, Daehak-ro, Yuseong-gu, Daejeon 34141, Republic of Korea; [j.w.park@kisti.re.kr](mailto:j.w.park@kisti.re.kr) (J.W.P.), [sj.seo@kisti.re.kr](mailto:sj.seo@kisti.re.kr) (S.S.)

<sup>3</sup> School of Systems Biomedical Science, Soongsil University, Seoul, 06978, Republic of Korea; [chokh@ssu.ac.kr](mailto:chokh@ssu.ac.kr) (K.-H.C.)

<sup>4</sup> Department of Pharmaceutical Chemistry, College of Pharmacy, King Saud University, Saudi Arabia; [mmalanazi@ksu.edu.sa](mailto:mmalanazi@ksu.edu.sa)

<sup>5</sup> Division of Bio-Medical Science & Technology, KIST School, Korea University of Science and Technology (UST), Seoul, 02792, Republic of Korea

\* Correspondence: [gkeum@kist.re.kr](mailto:gkeum@kist.re.kr) (G. Keum), [ashraf.el-damasy@kist.re.kr](mailto:ashraf.el-damasy@kist.re.kr) or [phkarem2006@gmail.com](mailto:phkarem2006@gmail.com) (A.K.El-Damasy)

| Contents                                              | Pages |
|-------------------------------------------------------|-------|
| 1) <sup>1</sup> H NMR and <sup>13</sup> C NMR spectra | 2–11  |
| 2) HRMS charts                                        | 12–21 |
| 3) Chemical structure of GW5074                       | 21    |
| 4) NCI single dose data                               | 22–31 |
| 5) Molecular docking                                  | 32–35 |
| 6) Molecular dynamics                                 | 36–37 |

### 1) $^1\text{H}$ NMR and $^{13}\text{C}$ NMR spectra

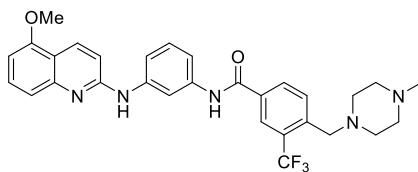

**AKA-VIII-75 (14a)**

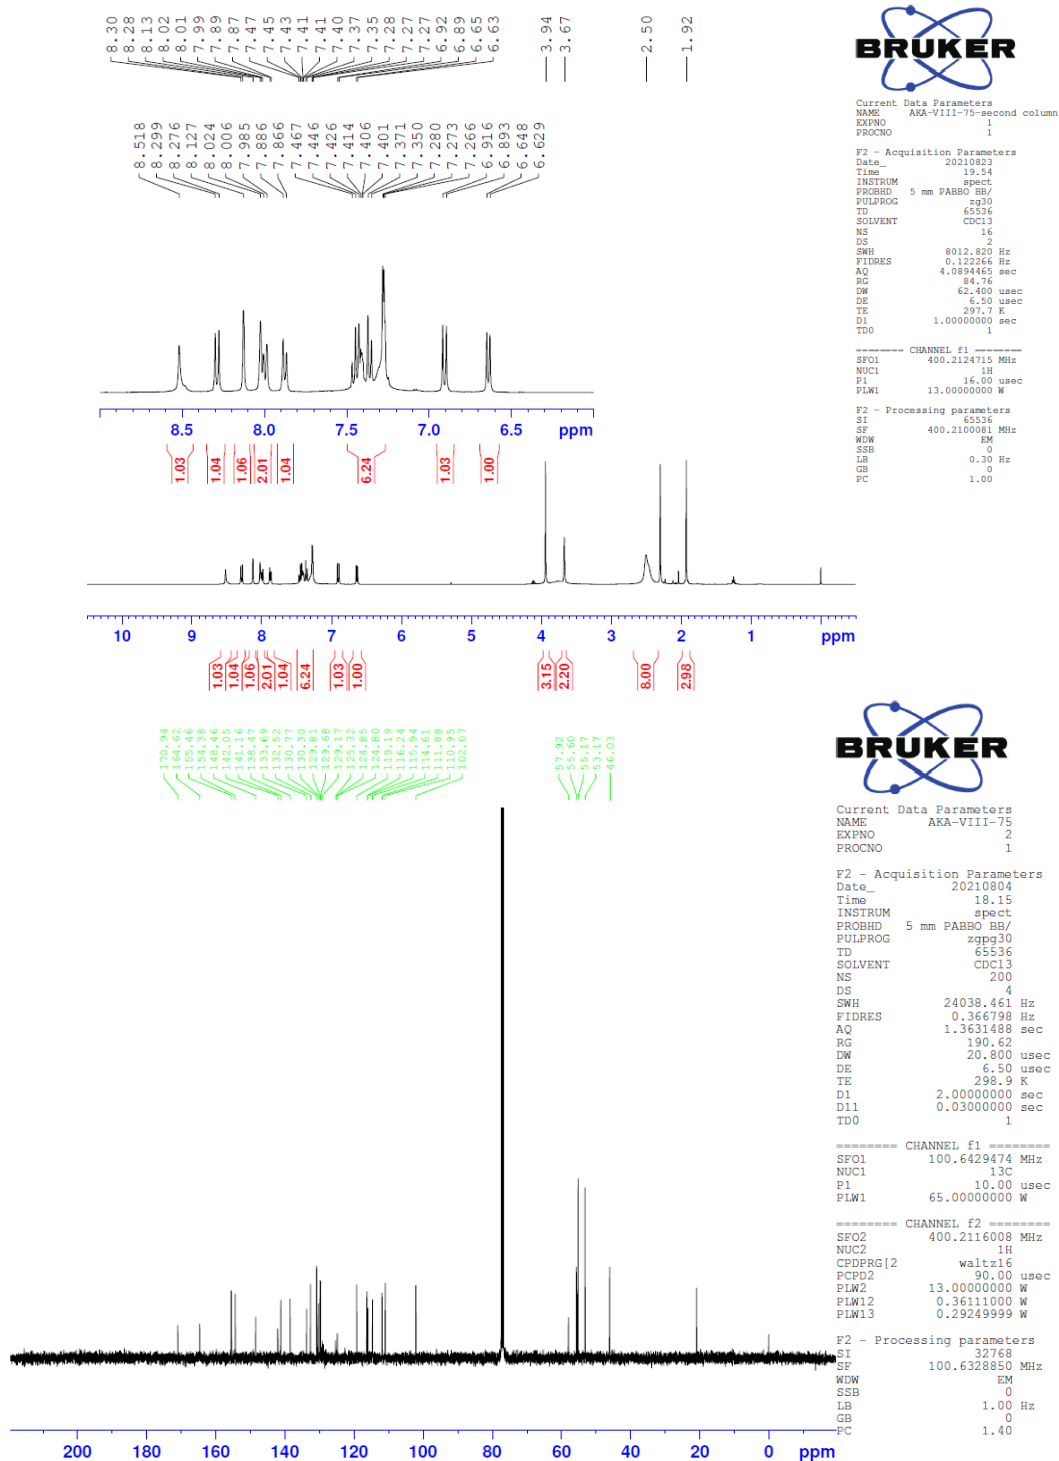

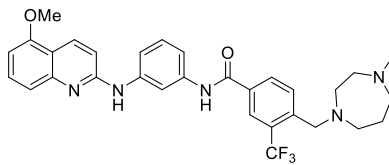

HJ\_1-99 = HJ\_2-9 (14b)

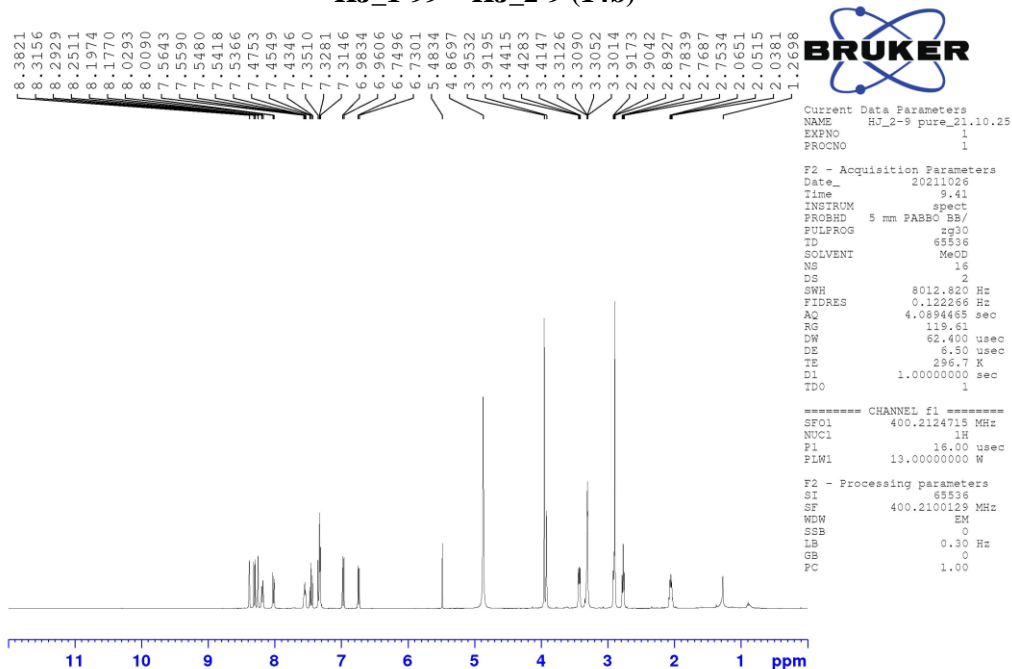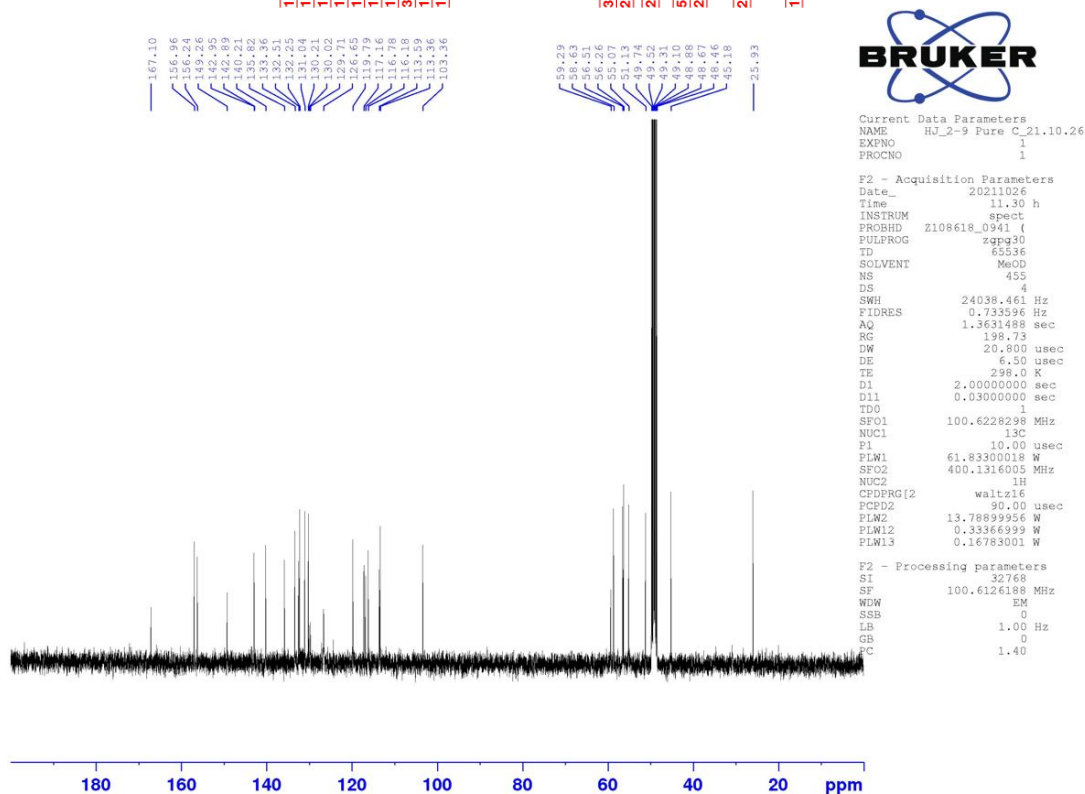

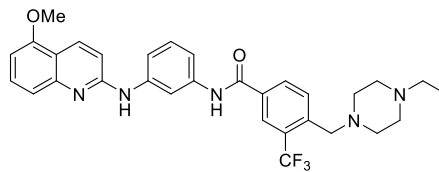

HJ-1-98 (14c)

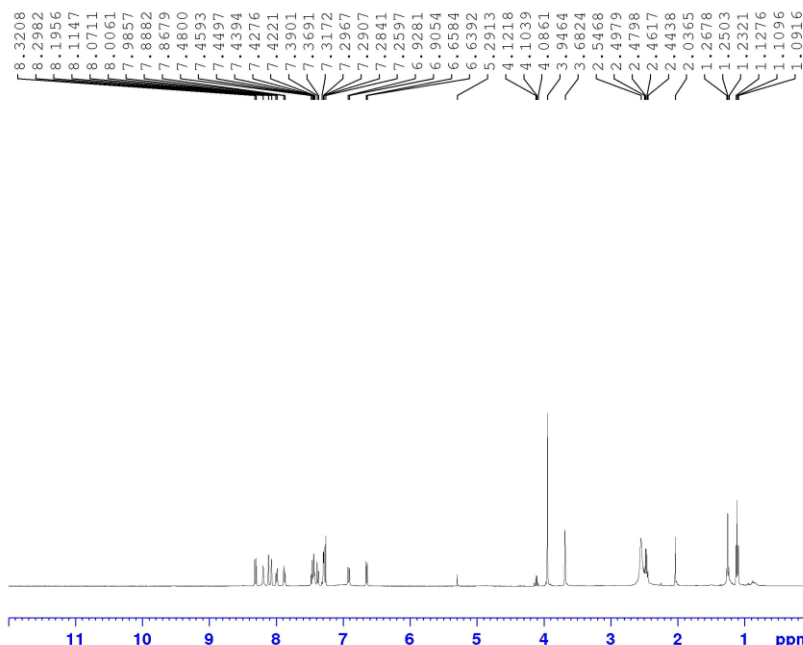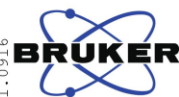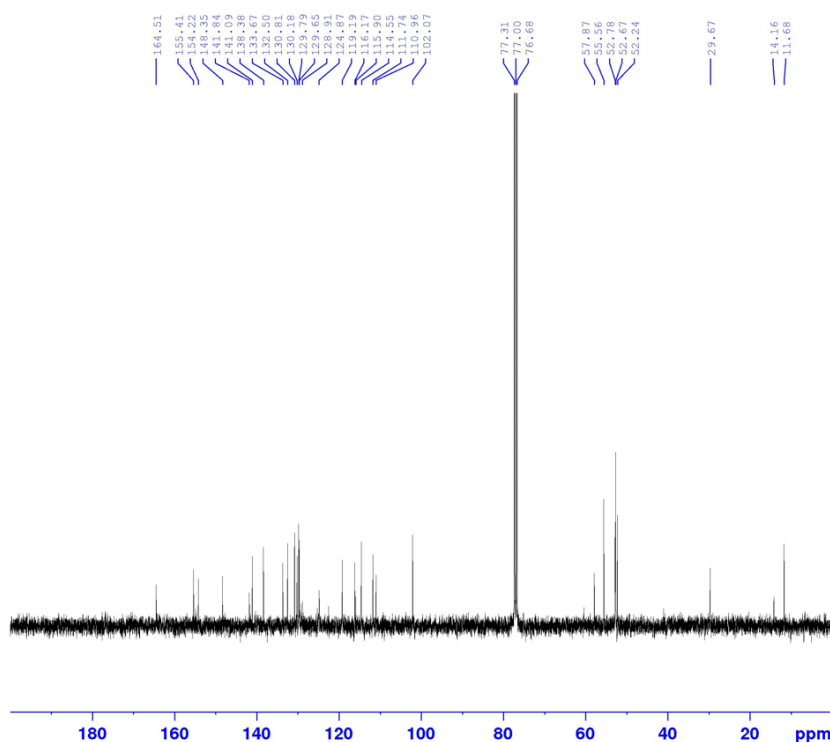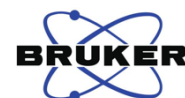

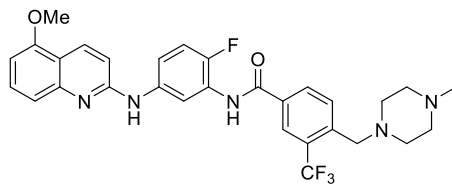

HJ\_2-32 (15a)

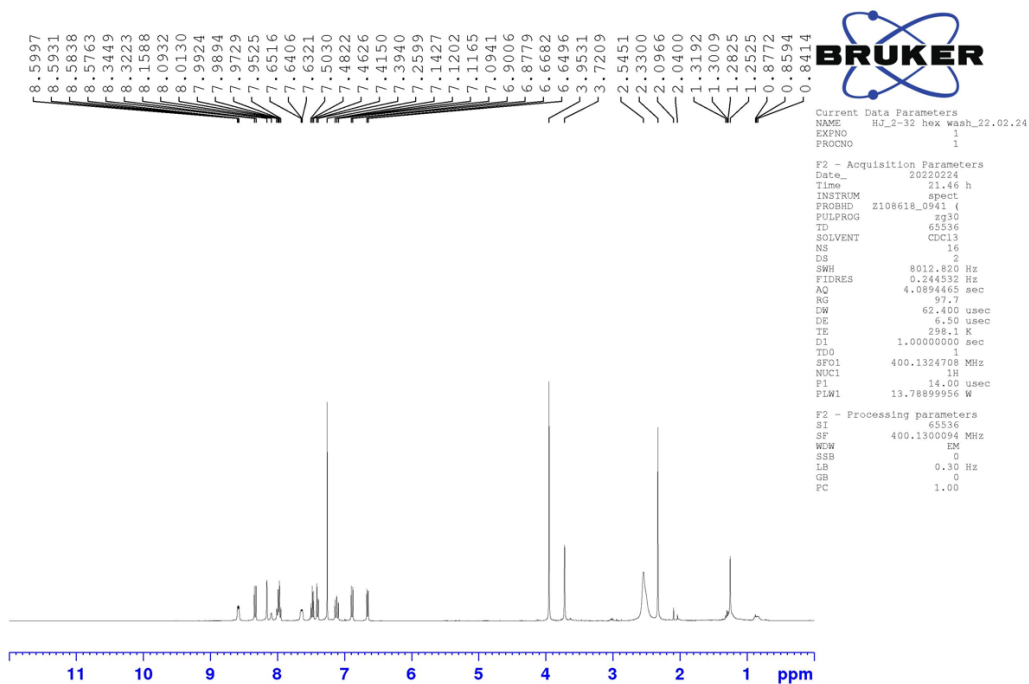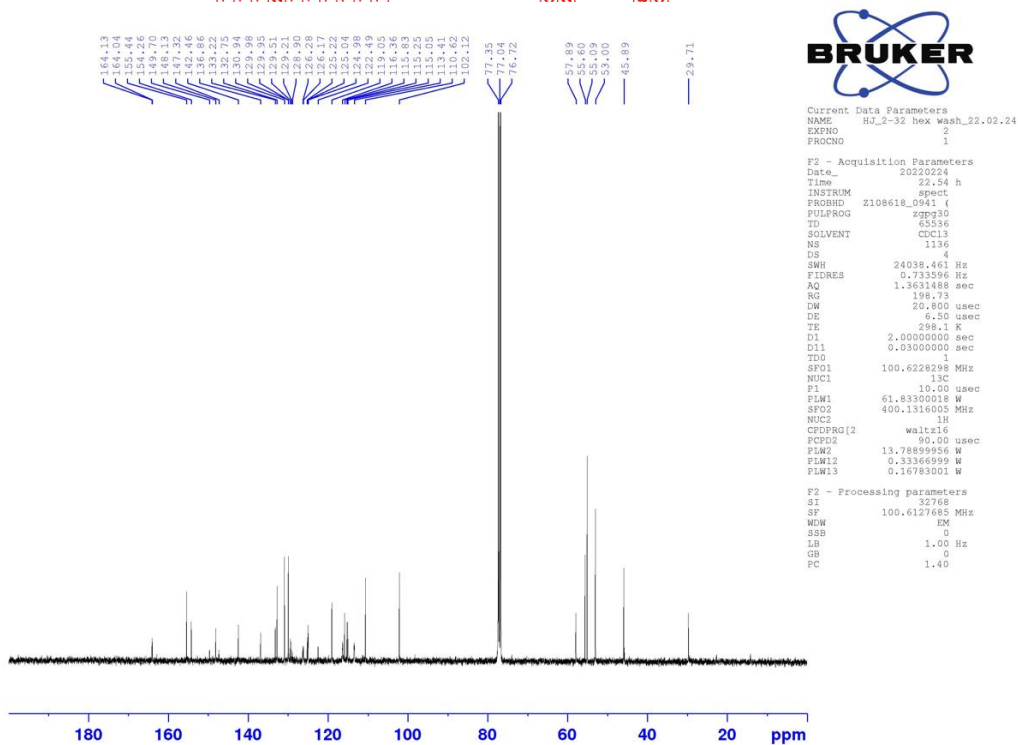

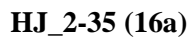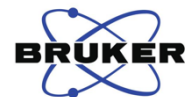

```
Current Data Parameters
NAME      HJ_2-35-2 3cc washed_22.01.17
EXPNO     1
PROCNO    1
```

```

F2 - Acquisition Parameters
Date_      20220117
Time       21:57
INSTRUM    spect
PROBHD     5 mm PABBO BB/
PULPROG    zg30
TD          65536
SOLVENT     CDCl3
NS          16
DS          2
SWH         8012.820 Hz
FIDRES      0.122266 Hz
AQ          4.089465 sec
RG          84.76
RG          62.400 usec
DE          6.50 usec
TE          298.1 K
D1          1.0000000 sec
TP0

```

```
===== CHANNEL f1 =====
SFO1      400.2124715 Mhz
NUC1      1H
P1         16.00 usec
PLW1      13.00000000 W
```

```
F2 - Processing parameters
SI                65536
SF                400.2100128 MHz
WDW               EM
SSB               0
LB                0.30 Hz
GB               0
PC               1.00
```

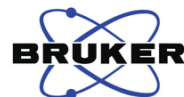

```
Current Data Parameters
NAME      HJ_2-35-2 3cc washed_22.01.17
EXPNO     2
PROCNO    1
```

```

F2 - Acquisition Parameters
Date_ 20220117
Time 22.39
INSTRUM spect
PROBHD 5 mm PABBO BB/
PULPROG zgpg30
TD 65536
SOLVENT CDCl3
NS 1500
DS 4
SWH 24038.461 Hz
FIDRES 0.366798 Hz
AQ 1.3631488 sec
RG 190.62
DW 20.800 usec
DE 6.50 usec
TE 298.1 K
D1 2.00000000 sec
D11 0.03000000 sec
TD0 1

```

```

===== CHANNEL f1 =====
SFO1      100.6429474 MHz
NUC1             13C
P1             10.00 usec
PLW1      65.000000000 W

```

```

===== CHANNEL f2 =====
SFO2      400.2116008 MHz
NUC2      1H
CPDPRG[2] waltz16
PCPD2      90.00 usec
PLW2      13.00000000 W
PLW12     0.36111000 W

```

```

PLW13      0.29249999 W
F2 - Processing parameters
SI          32768
SF          100.6328851 MHz
WDW         EM
SSB         0
LB          1.00 Hz
GB          0
PC          1.40

```

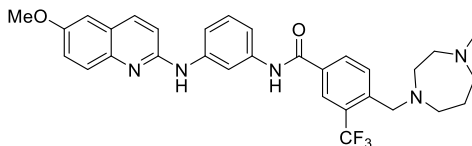

# HJ\_2-33 = 2-47 (16b)

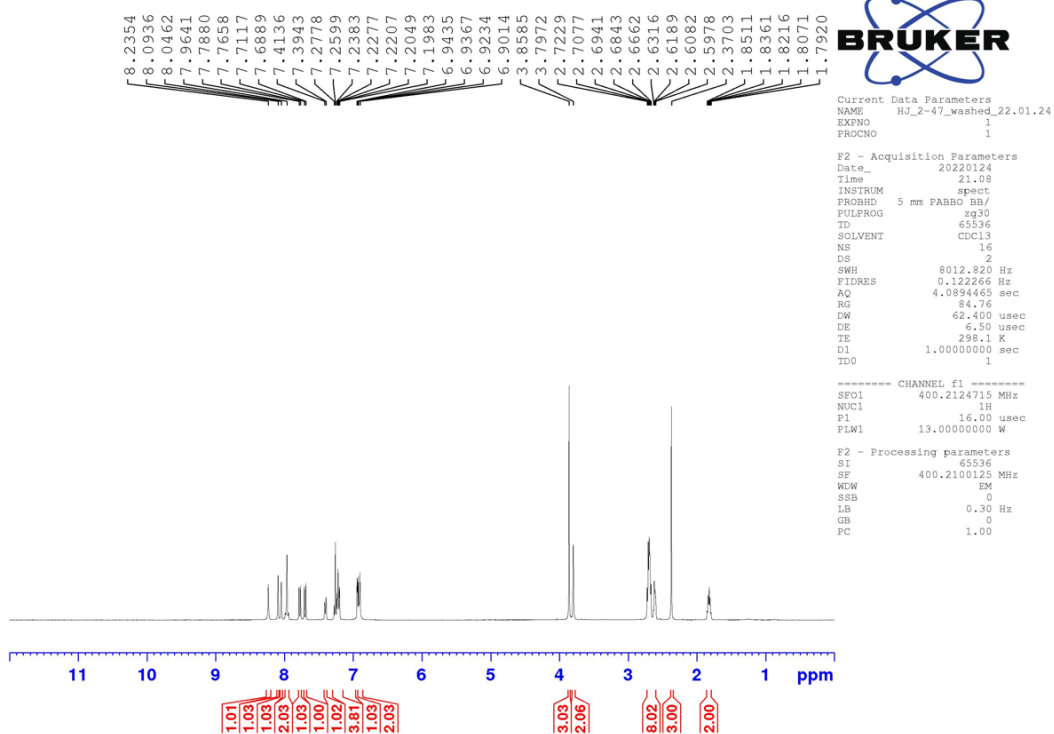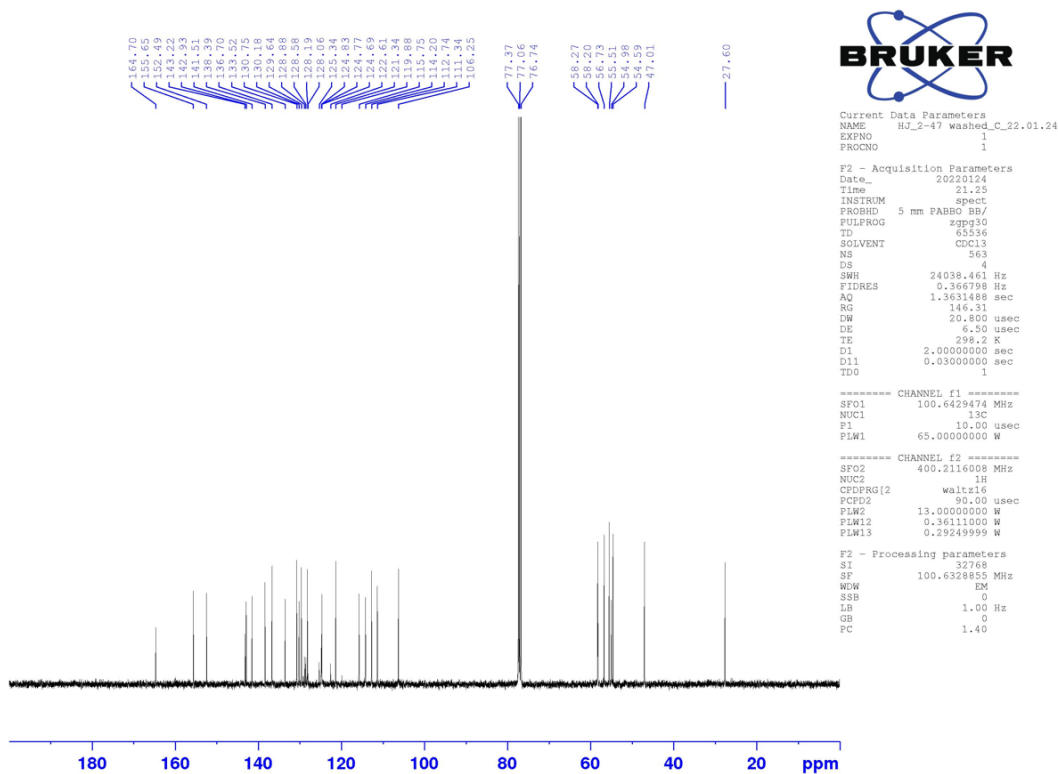

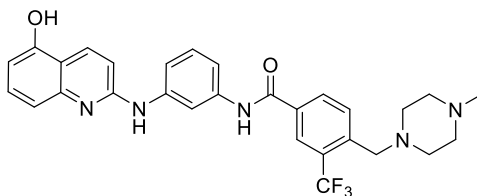

HJ\_2-14 (17a)

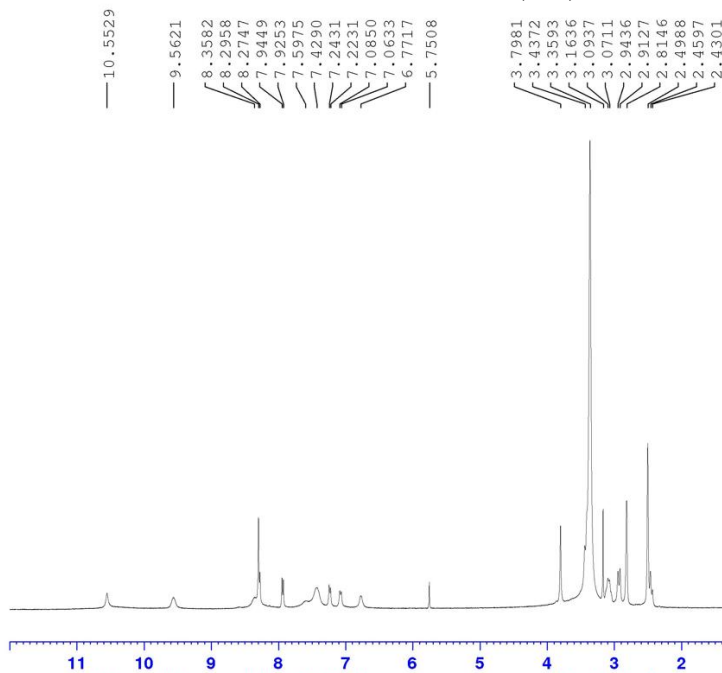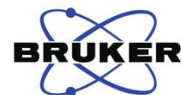

Current Data Parameters  
NAME HJ\_2-14 DMSO H\_22.04.20  
EXPNO 1  
PROCNO 1

F2 - Acquisition Parameters  
Date\_ 20220420  
Time 21.47  
INSTRUM spect  
PROBHD 5 mm PABBO BB/  
PULPROG zg30  
TD 65536  
SOLVENT DMSO  
NS 16  
DS 2  
SWH 8012.820 Hz  
FIDRES 0.122266 Hz  
AQ 4.0894465 sec  
RG 171.62  
DW 62.400 usec  
DE 6.50 usec  
TE 293.1 K  
D1 1.00000000 sec  
TDO 1

===== CHANNEL f1 =====  
SFO1 400.2124715 MHz  
NUC1 1H  
P1 16.00 usec  
PLW1 13.00000000 W

F2 - Processing parameters  
SI 65536  
SF 400.2100067 MHz  
WVW EM  
SSB 0  
LB 0.30 Hz  
GB 0  
PC 1.00

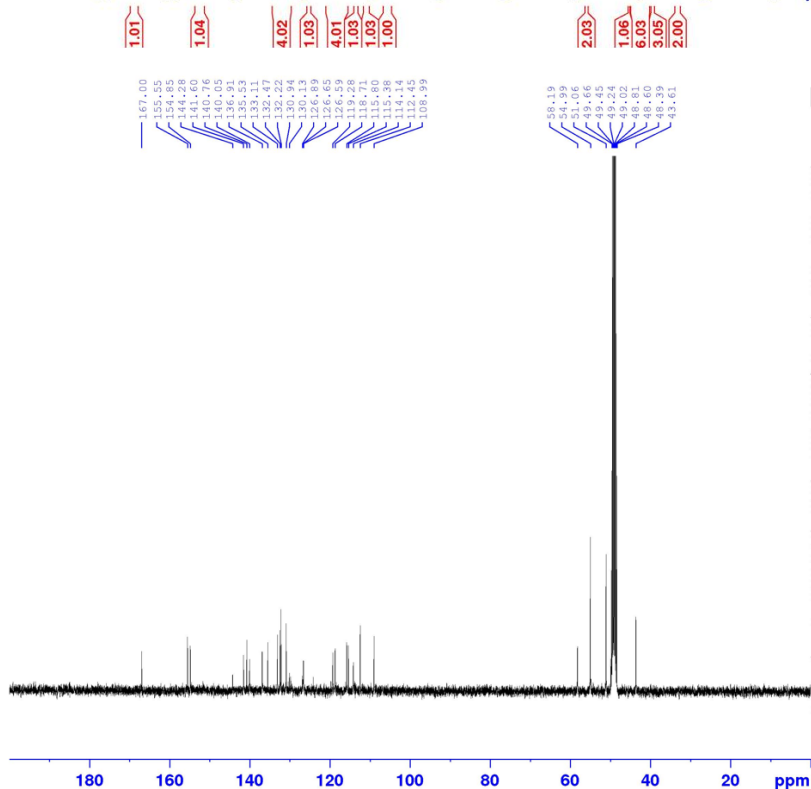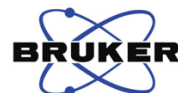

Current Data Parameters  
NAME HJ\_2-14\_21.11.04  
EXPNO 2  
PROCNO 1

F2 - Acquisition Parameters  
Date\_ 20211104  
Time 10.01 h  
INSTRUM spect  
PROBHD Z108618\_0941 (  
PULPROG zgpg30  
TD 65536  
SOLVENT MeOD  
NS 310  
DS 4  
SWH 24038.461 Hz  
FIDRES 0.733596 Hz  
AQ 1.3631488 sec  
RG 198.73  
DW 20.800 usec  
DE 6.50 usec  
TE 297.9 K  
D1 2.00000000 sec  
D11 0.03000000 sec  
TDO 1  
SFO1 100.6228298 MHz  
NUC1 13C  
P1 10.00 usec  
PLW1 61.83300018 W  
SFO2 400.1316005 MHz  
NUC2 1H  
PCPD2 waltz16  
PLW2 13.78899956 W  
PLW12 0.33366999 W  
PLW13 0.16783001 W

F2 - Processing parameters  
SI 32768  
SF 100.6126287 MHz  
WVW EM  
SSB 0  
LB 1.00 Hz  
GB 0  
PC 1.40



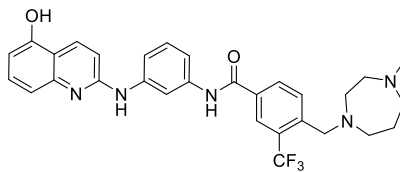

HJ\_2-12 (17b)

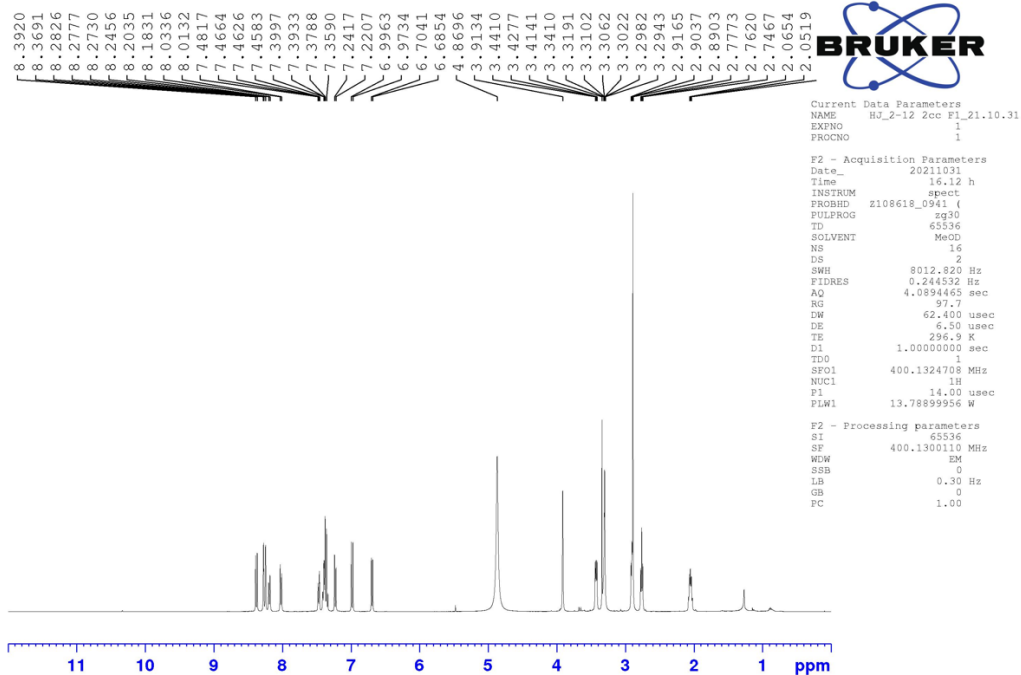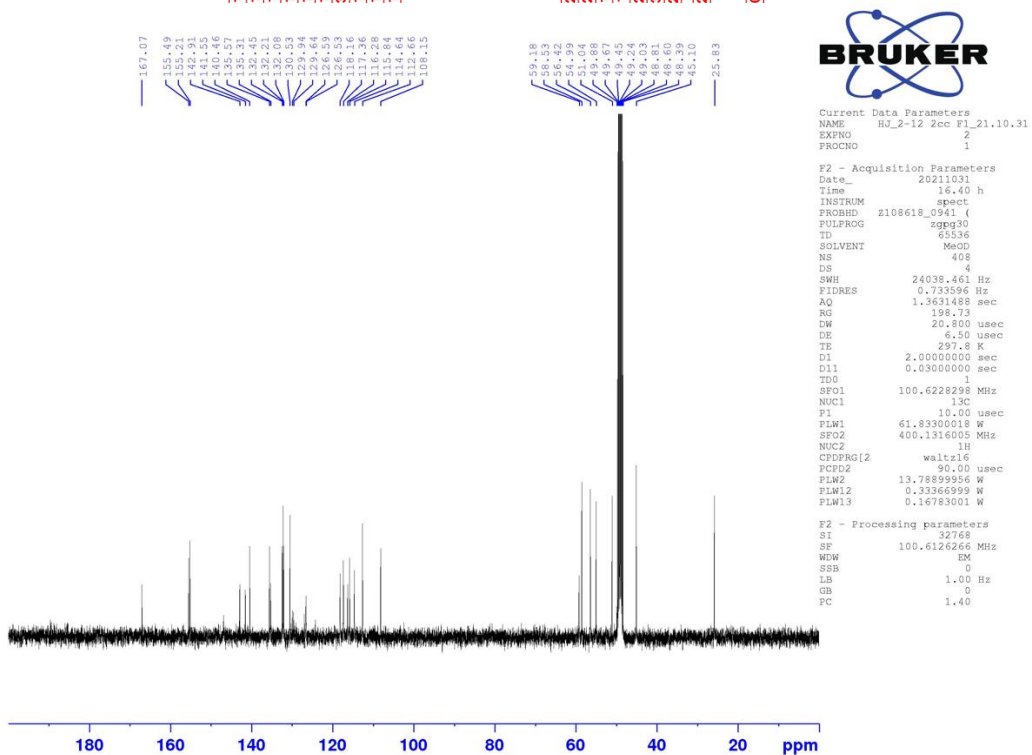

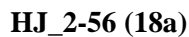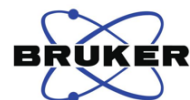

```
Current Data Parameters
NAME      HJ_2-56 3cc filter_22.02.21
EXPNO     1
PROCNO    1
```

```

F2 - Acquisition Parameters
Date_      20220221
Time       18.58
INSTRUM    spect
PROBHD     5 mm PABBO BB/
PULPROG    zg30
TD          65536
SOLVENT    MeOD
NS          16
DS          2
SWH         8012.820 Hz
FIDRES     0.122266 Hz
AQ         4.0849445 sec
RG          119.61
DW         62.400 usec
DE         6.50 usec
TE         296.7 K
D1         1.00000000 sec
TD0        .1

```

```
===== CHANNEL f1 =====
SFO1      400.2124715 MHz
NUC1              1H
P1              16.00 usec
PLW1      13.00000000 W
```

```
F2 - Processing parameters
SI                      65536
SF                      400.2100000 MHz
WDW                      EM
SSB                      0
LB                      0.30 Hz
GB                      0
PC                      1.00
```

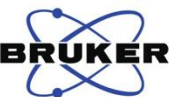

```
Current Data Parameters
NAME      HJ_2-56 C_22.02.28
EXPNO      1
PROCNO     1
```

```

F2 - Acquisition Parameters
Date_      20220228
Time       22.43
INSTRUM    spect
PROBHD     5 mm PABBO BB/
PULPROG    zgpg30
ID         65536
SOLVENT    MeOD
NS         5200
DS         4
SWH        24038.461 Hz
FIDRES     0.366798 Hz
AQ         1.3631488 sec
RG         190.62
DE         20.800 use
TE         6.50 use
TD         298.1 K
D1         2.00000000 sec
D11        0.03000000 sec
TD0        1

```

```
===== CHANNEL f1 =====
SF01      100.6429474 MHz
NUC1              13C
P1              10.00 usec
PLW1      65.00000000 W
```

```

SFO2      400.2116008 MHz
NUC2      1H
CPDPRG2   waltz16
PCPD2     90.00 usec
PLW2      13.00000000 W
PLW12     0.36110000 W
PLW13     0.29249999 W

```

```
F2 - Processing parameters
SI              32768
SF              100.6327424 MHz
WDW             EM
SSB             0
LB              1.00 Hz
GB              0
PC              1.40
```

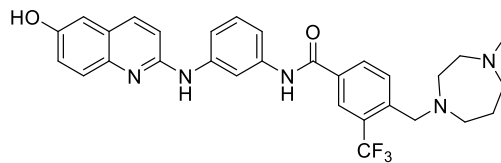

HJ\_2-57 (18b)

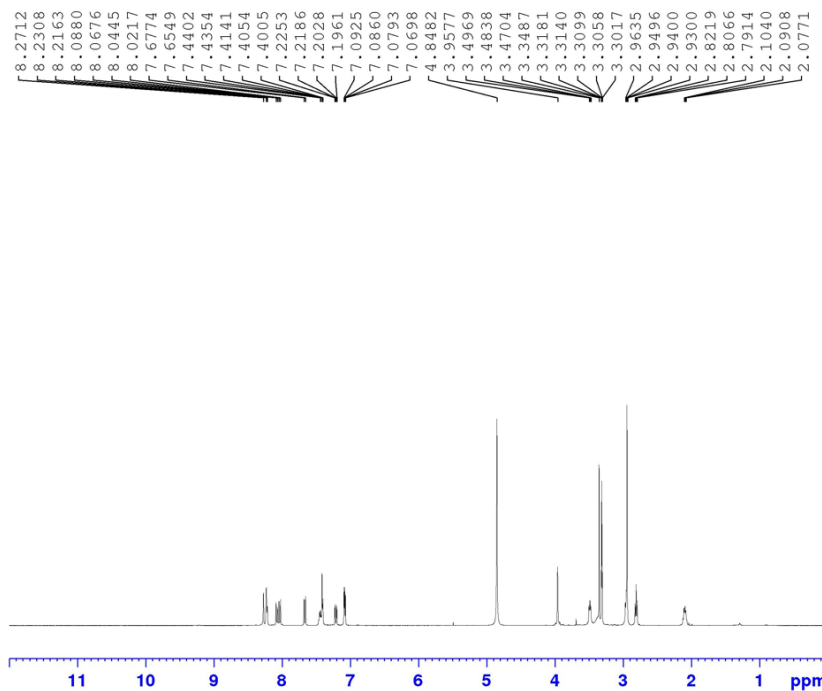

**BRUKER**

Current Data Parameters  
NAME HJ\_2-57\_3cc v2.DCN wash\_22.02.23  
EXPNO 1  
PROCNO 1

F2 - Acquisition Parameters  
Date\_ 20220301  
Time 21.36 h  
INSTRUM spect  
PROBHD Z108618\_0941 (   
PULPROG zgpg30  
TD 65536  
SOLVENT MeOD  
NS 16  
DS 2  
SWH 8012.820 Hz  
FIDRES 0.244532 Hz  
AQ 4.088463 sec  
RG 198.73  
DW 65.400 usec  
DE 6.50 usec  
TE 298.1 K  
D1 1.00000000 sec  
TD0 1  
SFO1 400.1324708 MHz  
NUC1 1H  
P1 14.00 usec  
PLW1 13.78899956 W

F2 - Processing parameters  
SI 65536  
SF 400.1300078 MHz  
WDW EM  
SSB 0  
LB 0.30 Hz  
GB 0  
PC 1.00

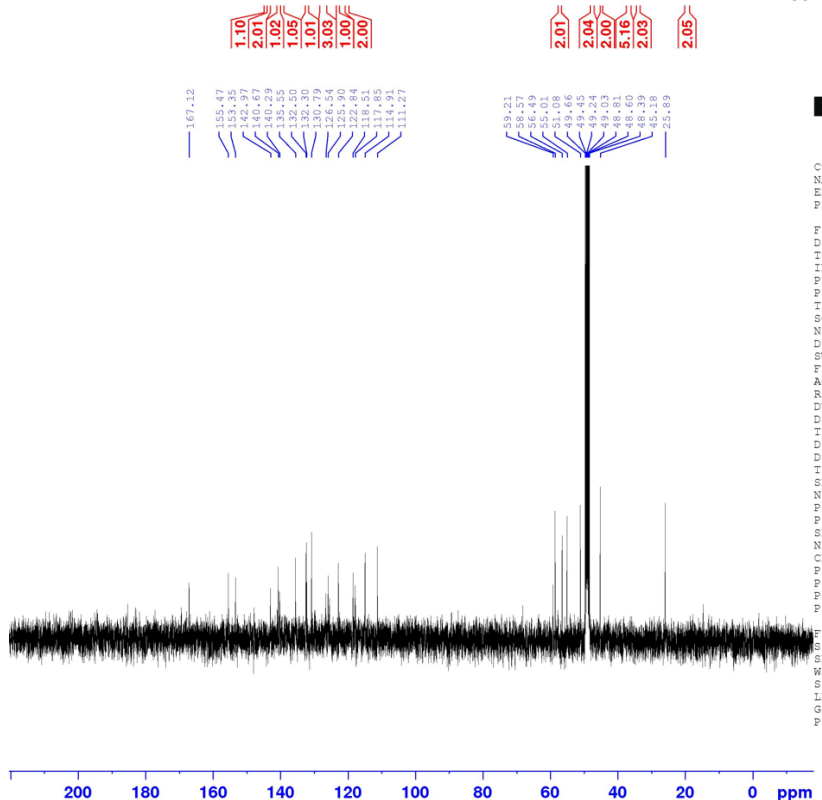

**BRUKER**

Current Data Parameters  
NAME HJ\_2-57 c\_22.02.28  
EXPNO 1  
PROCNO 1

F2 - Acquisition Parameters  
Date\_ 20220301  
Time 6.20 h  
INSTRUM spect  
PROBHD Z108618\_0941 (   
PULPROG zgpg30  
TD 65536  
SOLVENT MeOD  
NS 8000  
DS 4  
SWH 24038.461 Hz  
FIDRES 0.733596 Hz  
AQ 1.3631488 sec  
RG 198.73  
DW 20.800 usec  
DE 6.50 usec  
TE 299.2 K  
D1 2.00000000 sec  
D11 0.03000000 sec  
TD0 1  
SFO1 100.6228298 MHz  
NUC1 13C  
P1 10.00 usec  
PLW1 61.83300018 W  
SFO2 400.1316005 MHz  
NUC2 1H  
CPDPRG[2] waltz16  
PCPD2 90.00 usec  
PLW2 13.78899956 W  
PLW12 0.33366999 W  
PLW13 0.16783001 W

F2 - Processing parameters  
SI 32768  
SF 100.6126259 MHz  
WDW EM  
SSB 0  
LB 1.00 Hz  
GB 0  
PC 1.40

## 2) HRMS charts

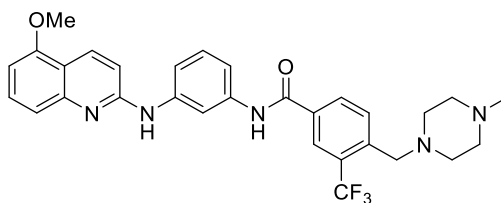

### AKA-VIII-75 (14a)

$C_{30}H_{31}F_3N_5O_2$   $[M+H]^+$ :

Calculated: 550.2430

Found: 550.2427

### Mass Spectrum: AKE-VIII-75 (Positive mode)

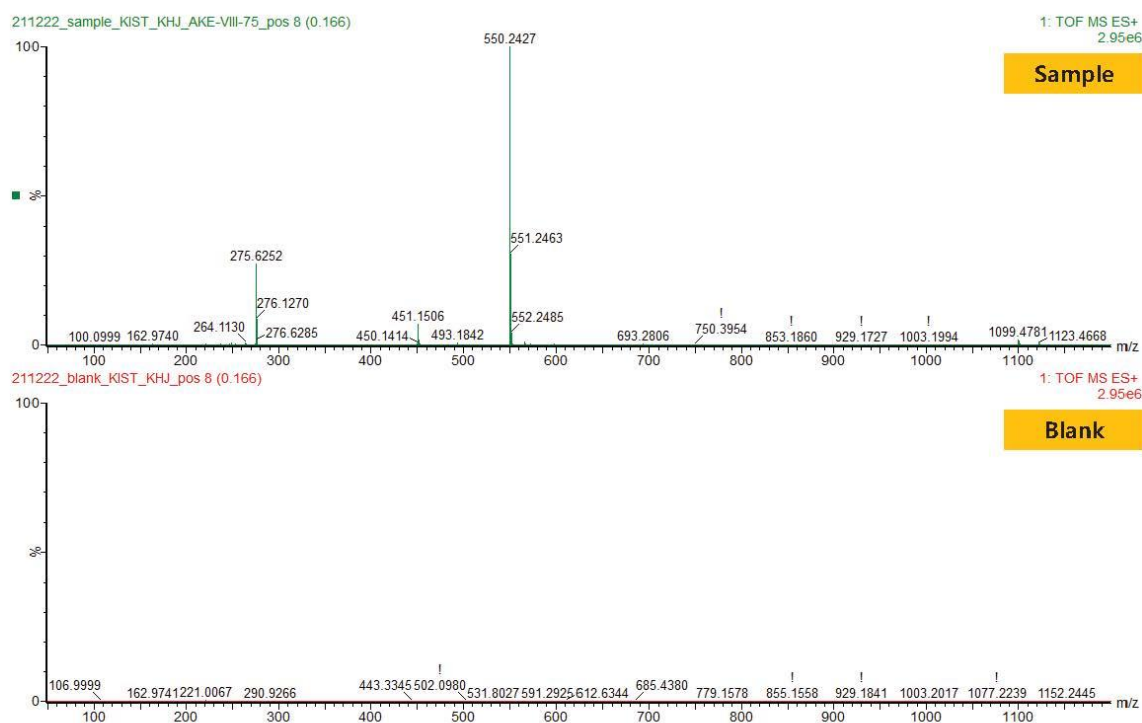

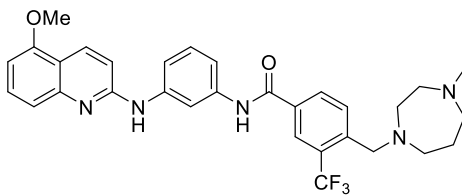

**HJ\_1-99 = HJ\_2-9 (14b)**

$\text{C}_{31}\text{H}_{33}\text{F}_3\text{N}_5\text{O}_2$   $[\text{M}+\text{H}]^+$ :

Calculated: 564.2586

Found: 564.2593

### Mass Spectrum: AK-HJ-II-9 (Positive mode)

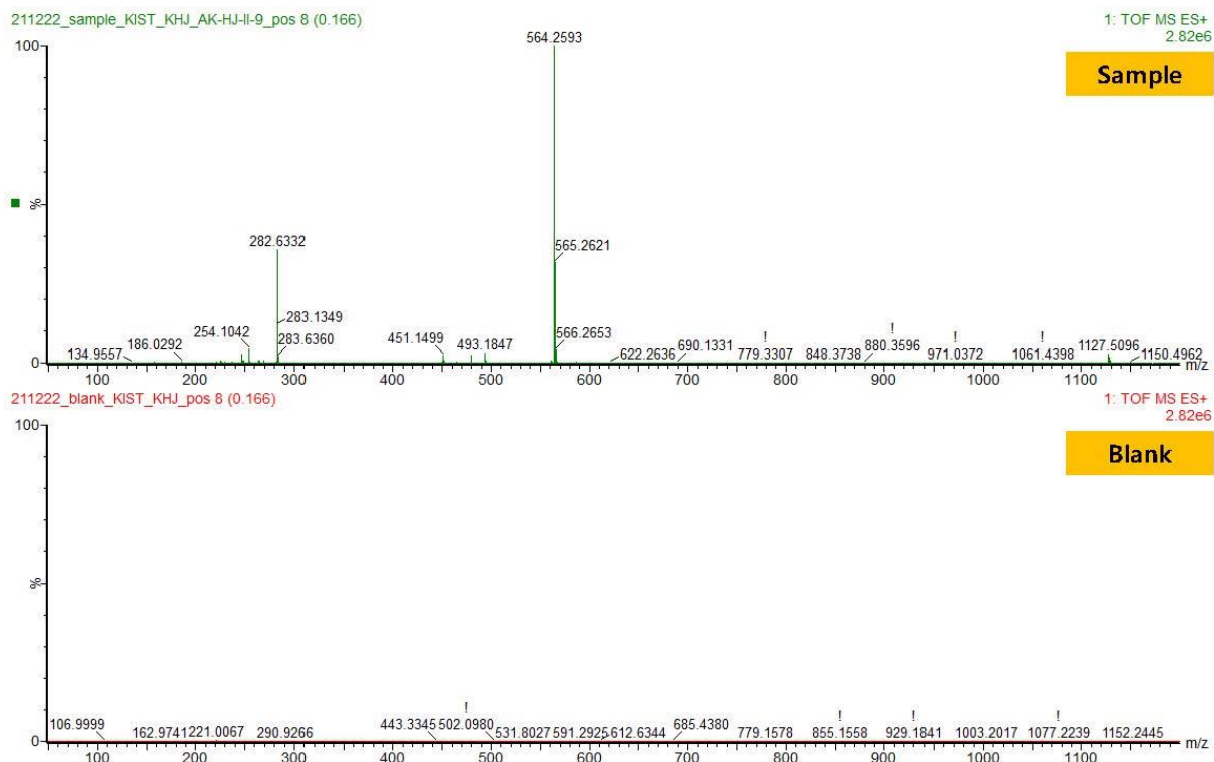

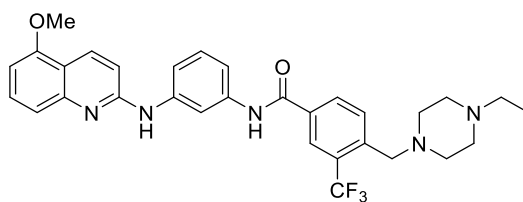

**HJ-1-98 (14c)**

$\text{C}_{31}\text{H}_{33}\text{F}_3\text{N}_5\text{O}_2$   $[\text{M}+\text{H}]^+$ :

Calculated: 564.2586

Found: 564.2587

### Mass Spectrum: AK-HJ-I-98 (Positive mode)

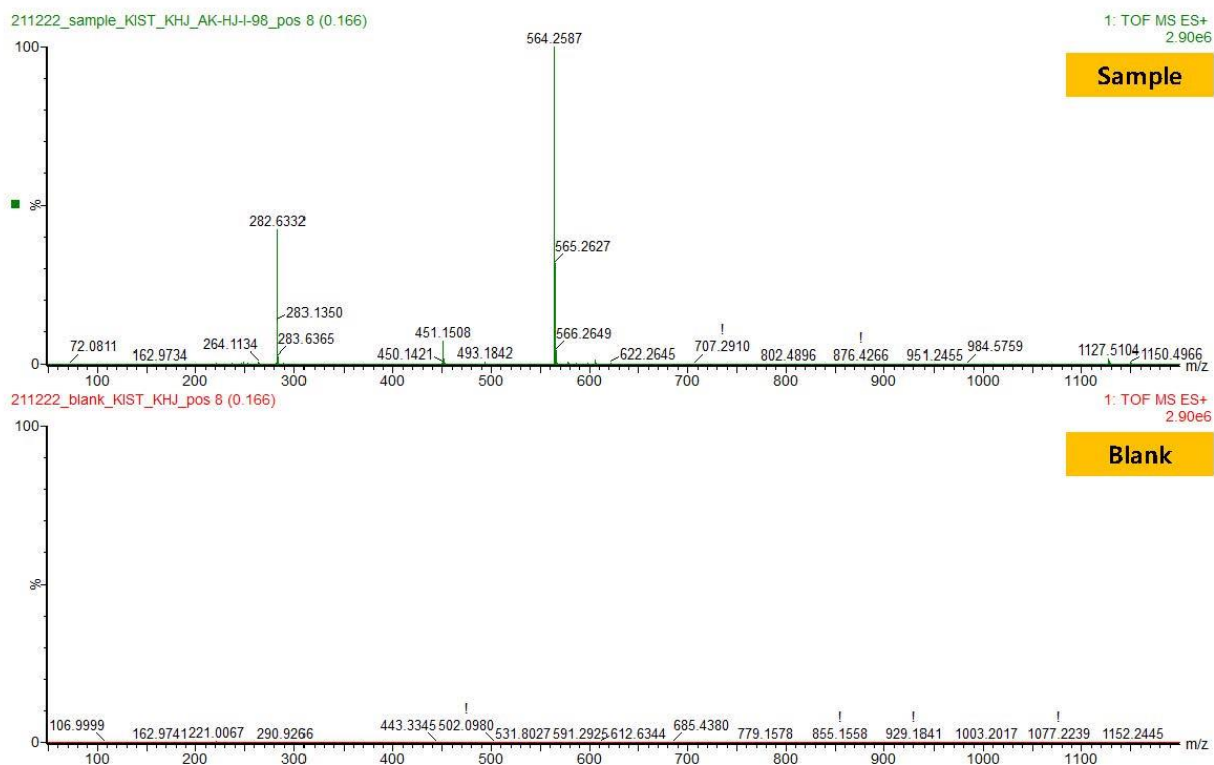

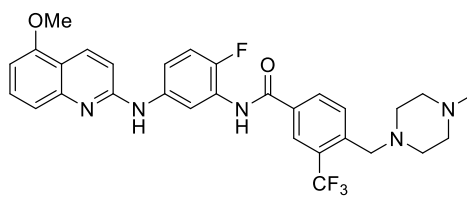

**HJ\_2-32 (15a)**

$C_{30}H_{30}F_4N_5O_2$   $[M+H]^+$ :

Calculated: 568.2336

Found: 568.2347

### Mass Spectrum: AK-HJ-II-32 (Positive mode)

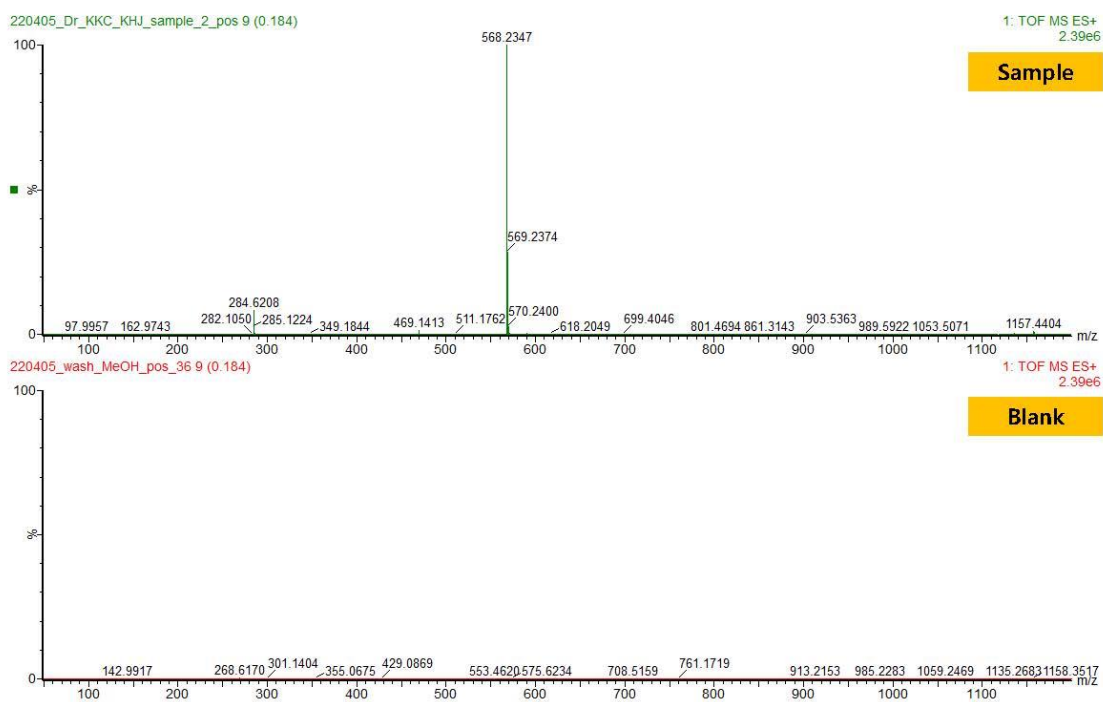

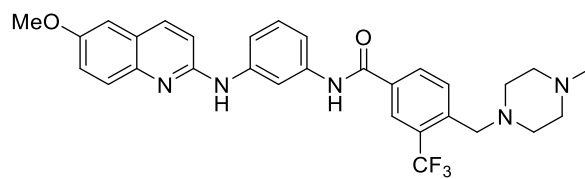

**HJ\_2-35 (16a)**

$\text{C}_{30}\text{H}_{31}\text{F}_3\text{N}_5\text{O}_2$   $[\text{M}+\text{H}]^+$ :

Calculated: 550.2430

Found: 550.2436

### Mass Spectrum: AK-HJ-II-35 (Positive mode)

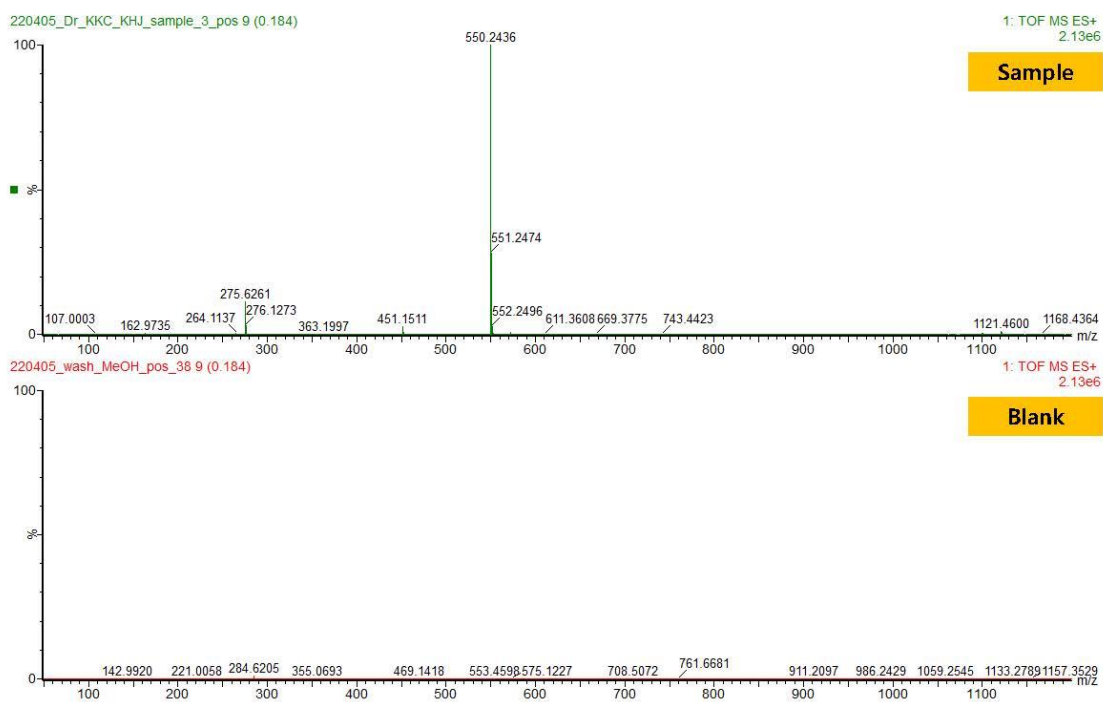



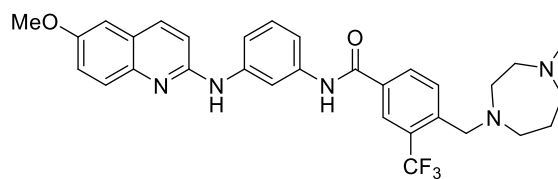

**HJ\_2-33 = 2-47 (16b)**

$\text{C}_{31}\text{H}_{33}\text{F}_3\text{N}_5\text{O}_2$   $[\text{M}+\text{H}]^+$ :

Calculated: 564.2586

Found: 564.2597

### Mass Spectrum: AK-HJ-II-47 (Positive mode)

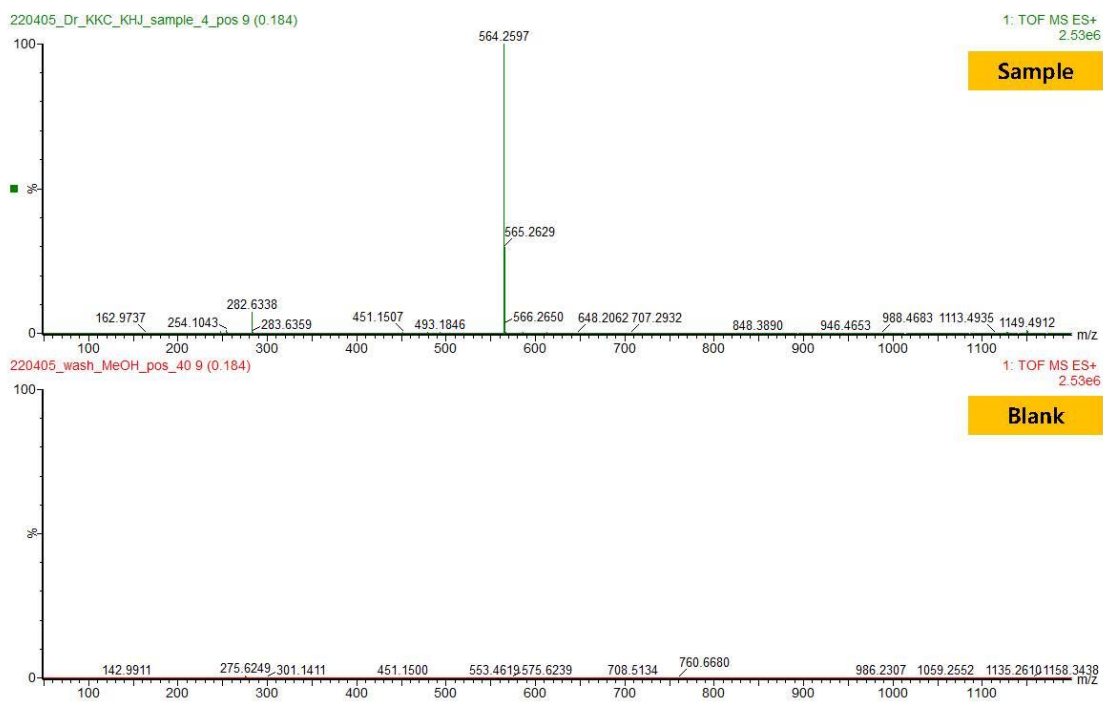

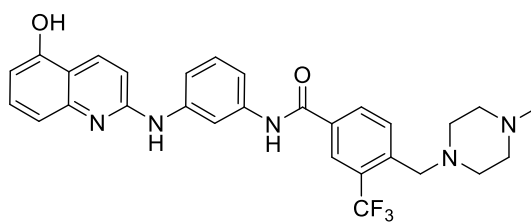

**HJ\_2-14 (17a)**

$\text{C}_{29}\text{H}_{29}\text{F}_3\text{N}_5\text{O}_2$   $[\text{M}+\text{H}]^+$ :

Calculated: 536.2274

Found: 536.2281

### Mass Spectrum: AK-HJ-II-14 (Positive mode)

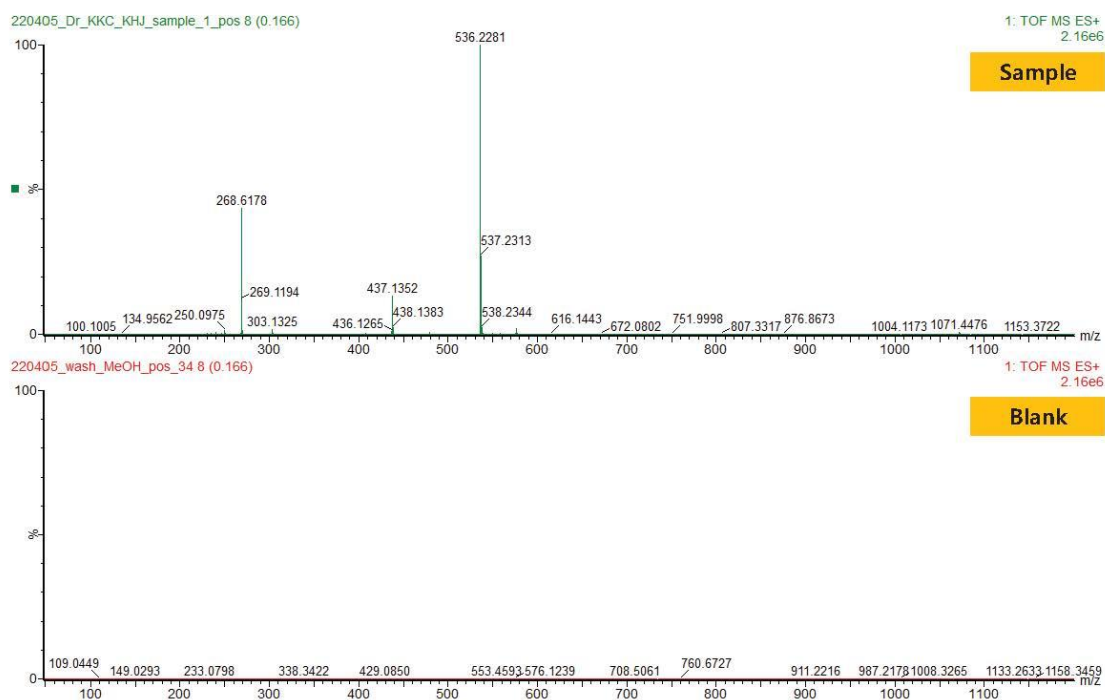

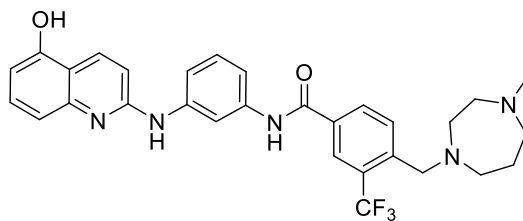

**HJ\_2-12 (17b)**

$\text{C}_{30}\text{H}_{31}\text{F}_3\text{N}_5\text{O}_2$   $[\text{M}+\text{H}]^+$ :

Calculated: 550.2430

Found: 550.2444

### Mass Spectrum: AK-HJ-II-12 (Positive mode)

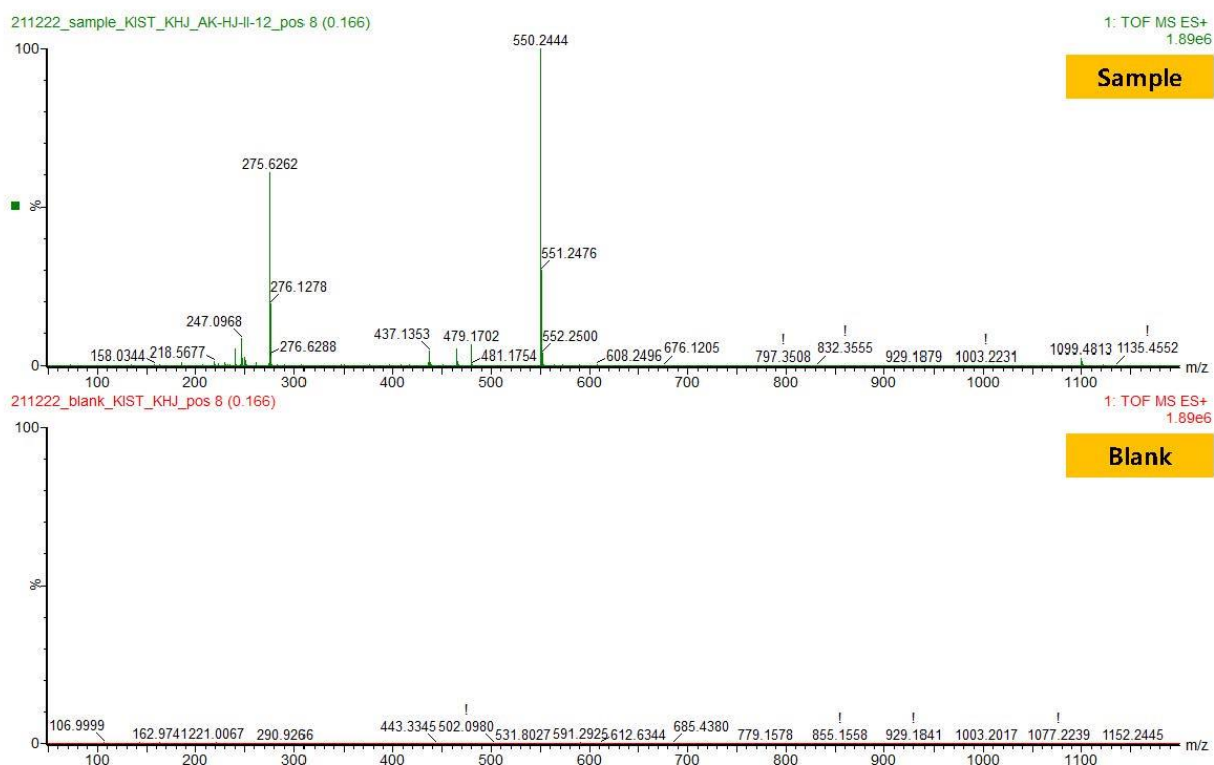

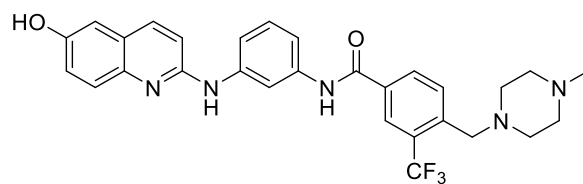

**HJ\_2-56 (18a)**

$\text{C}_{29}\text{H}_{29}\text{F}_3\text{N}_5\text{O}_2$   $[\text{M}+\text{H}]^+$ :

Calculated: 536.2274

Found: 536.2279

### Mass Spectrum: AK-HJ-II-56 (Positive mode)

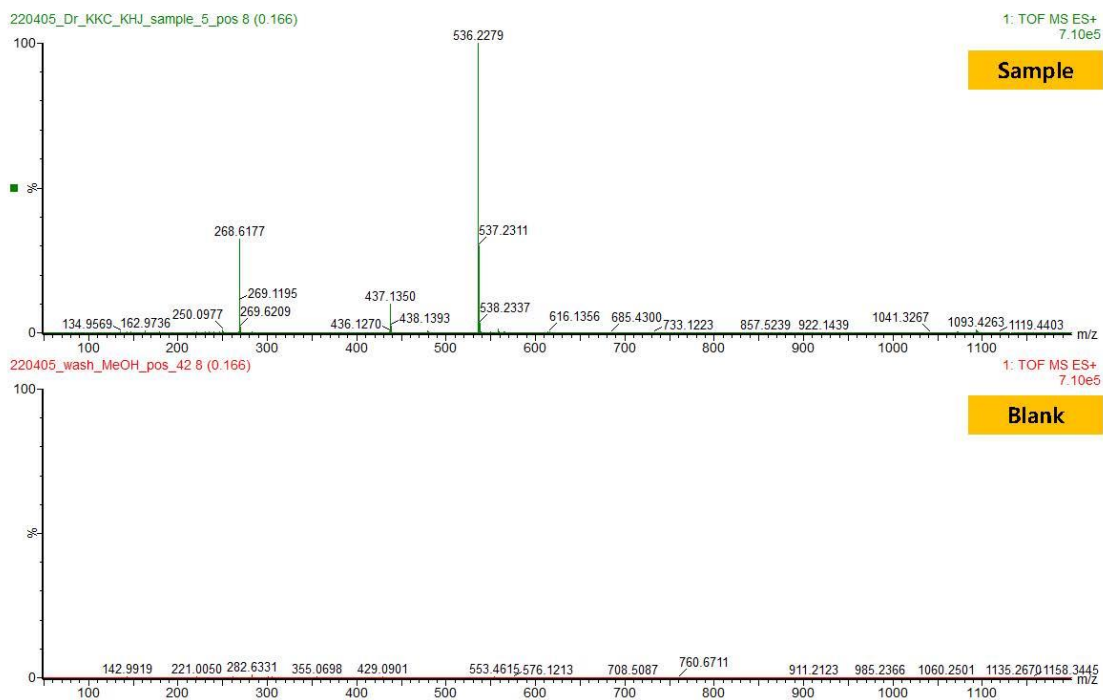

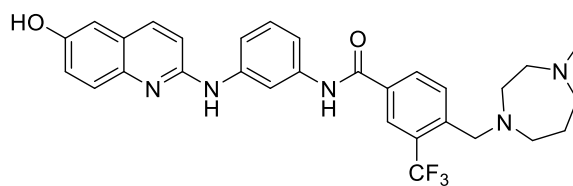

**HJ\_2-57 (18b)**

$C_{30}H_{31}F_3N_5O_2$   $[M+H]^+$ :

Calculated: 550.2430

Found: 550.2441

**Mass Spectrum: AK-HJ-II-57 (Positive mode)**

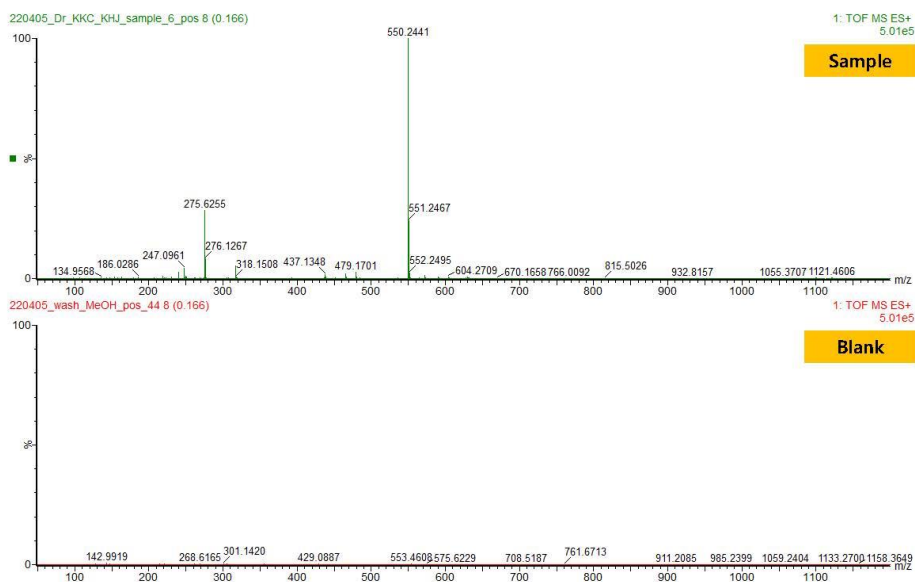

### 3) Chemical structure of GW5074

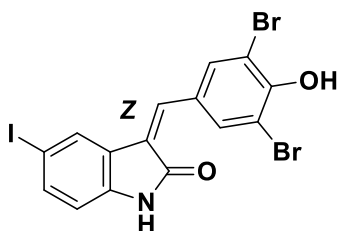

**GW5074**

#### 4) NCI data

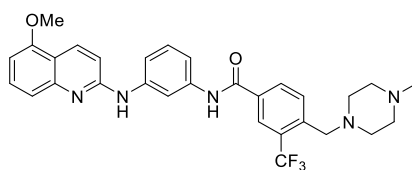

AKA-VIII-75 (14a)

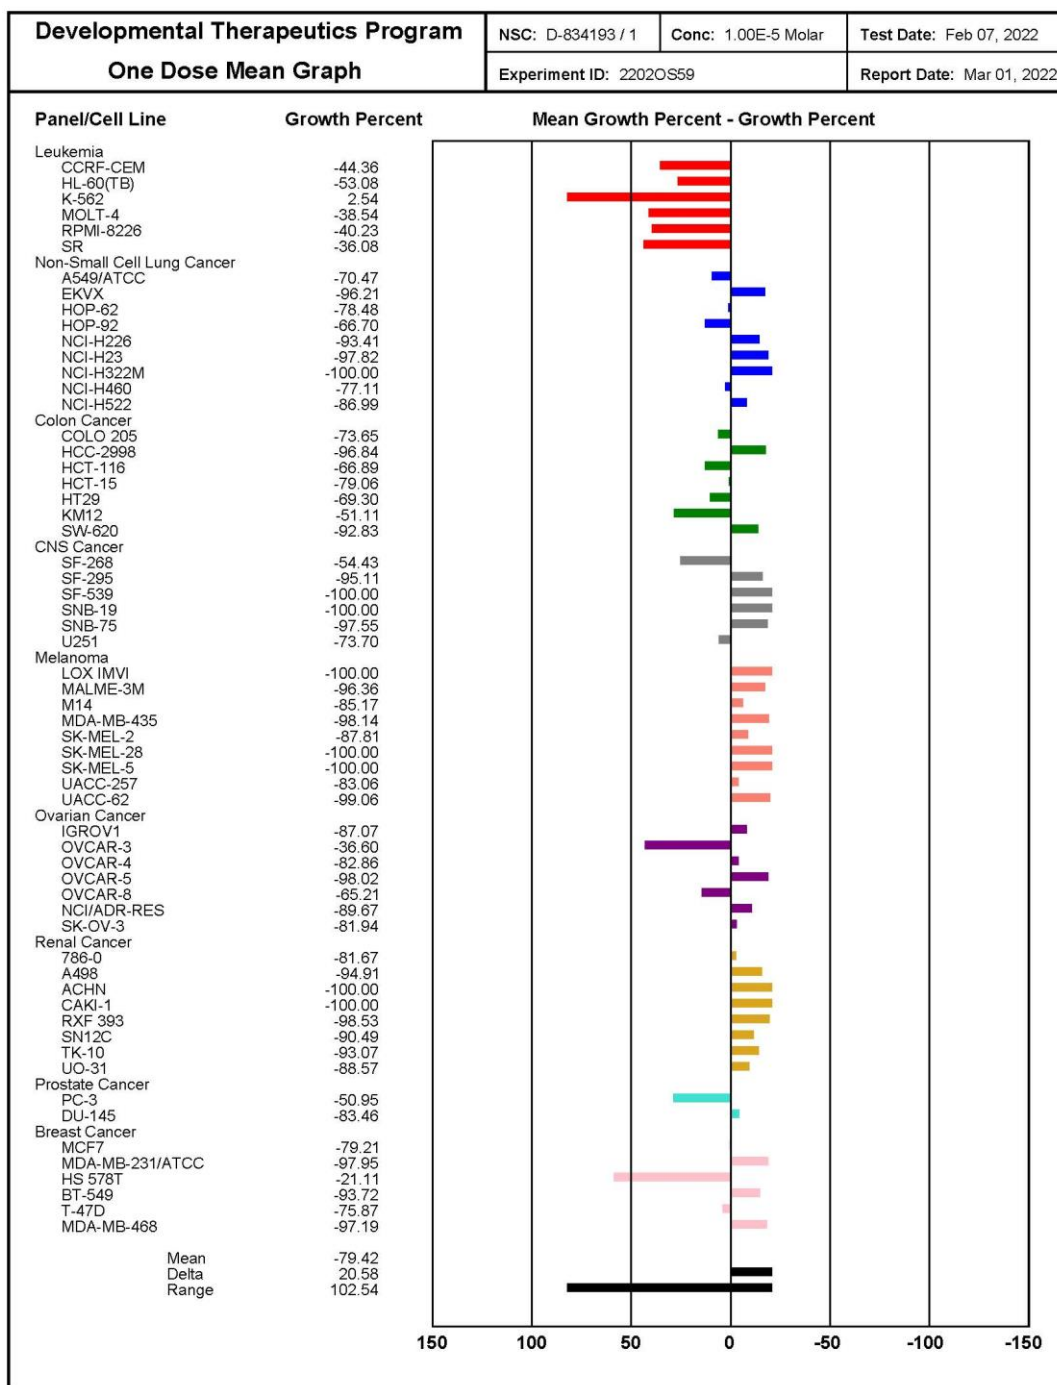

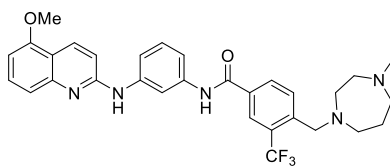

HJ\_1-99 = HJ\_2-9 (14b)

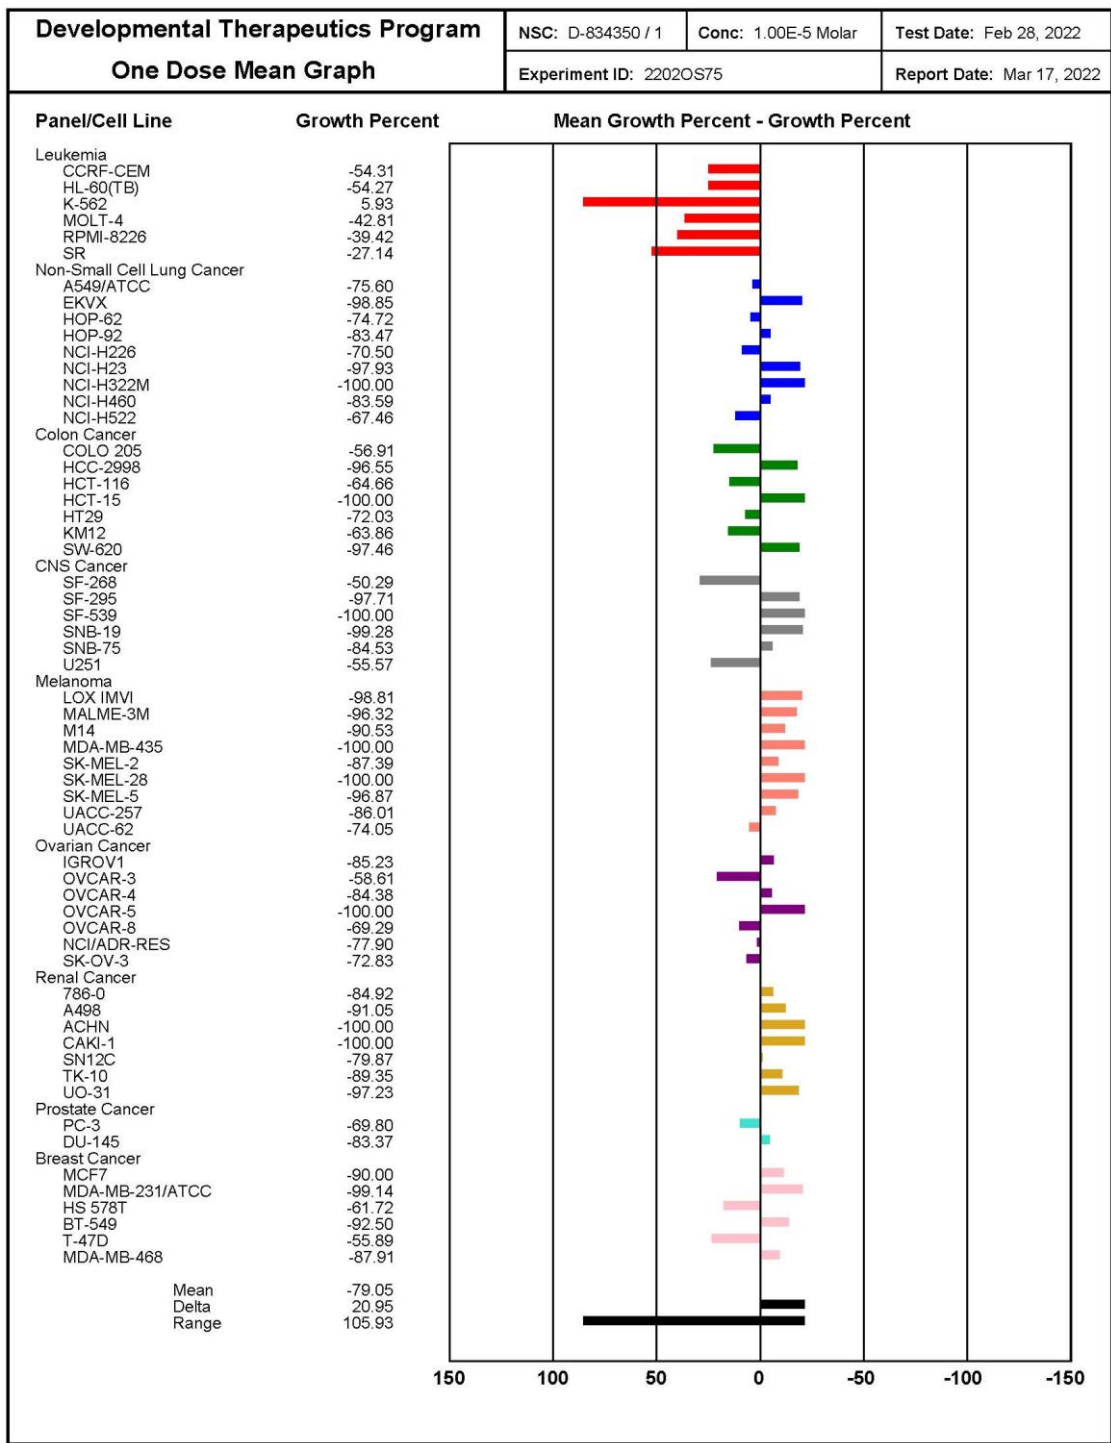

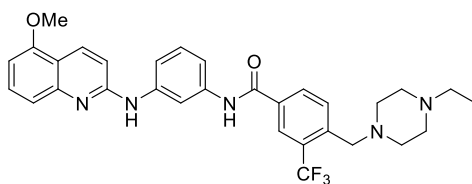

HJ-1-98 (14c)

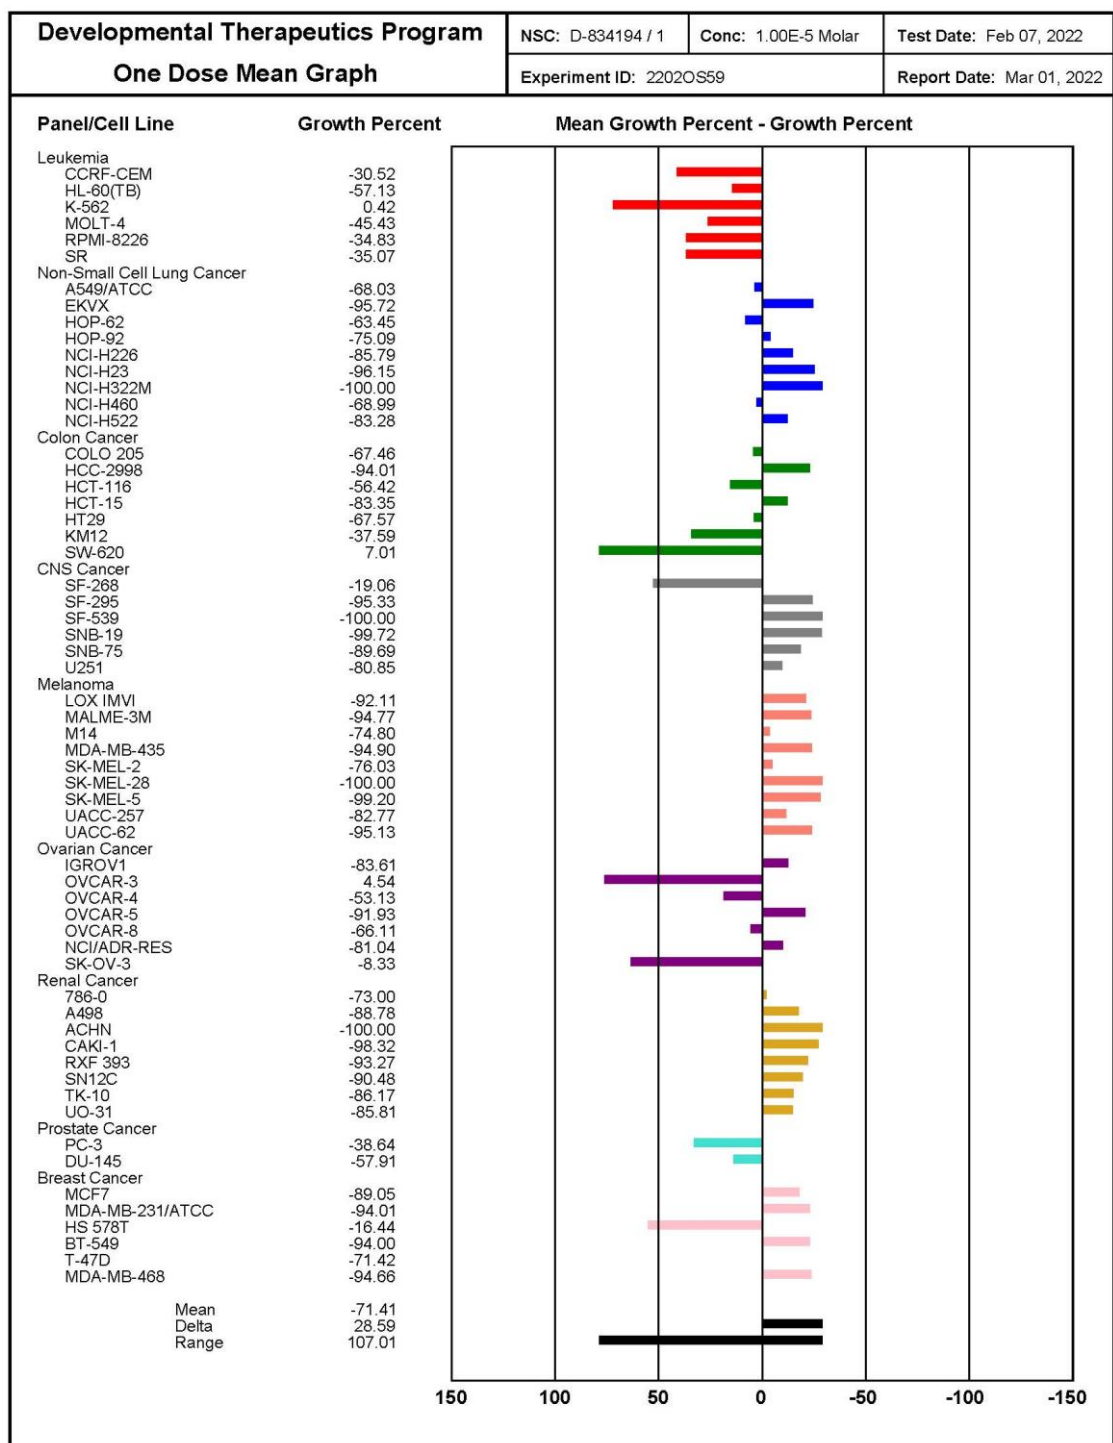



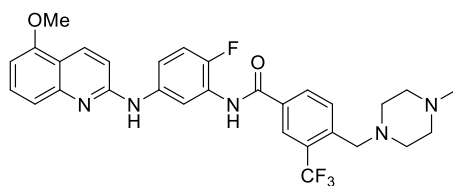

HJ\_2-32 (15a)

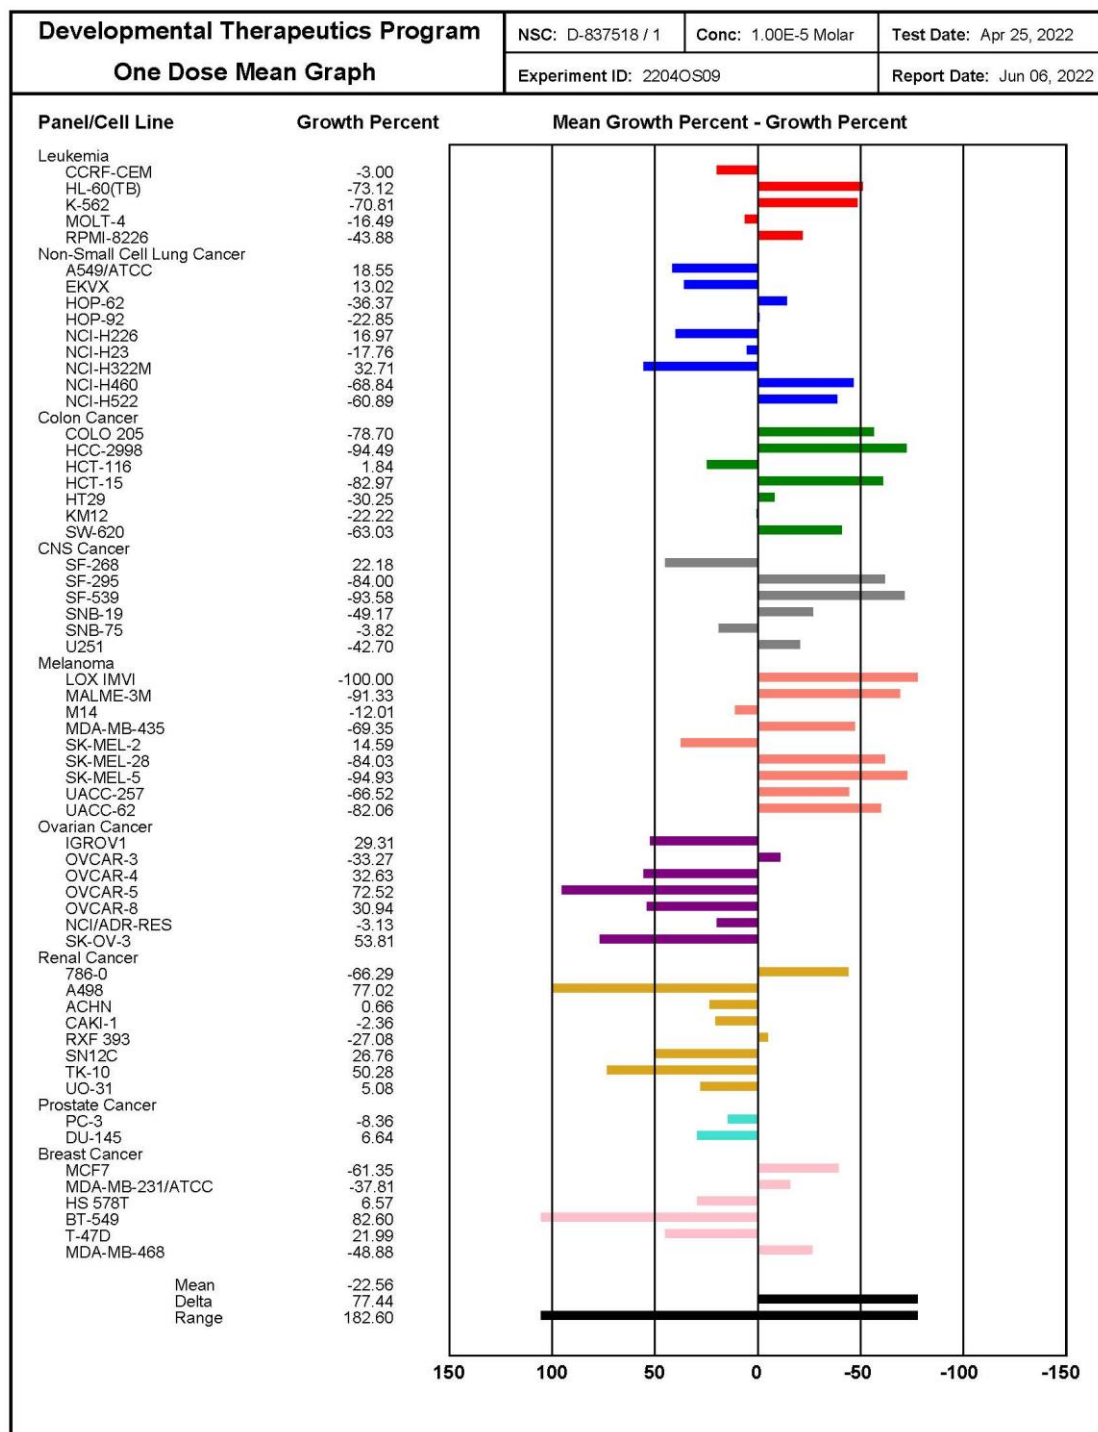

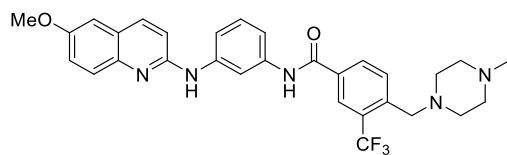

HJ\_2-35 (16a)

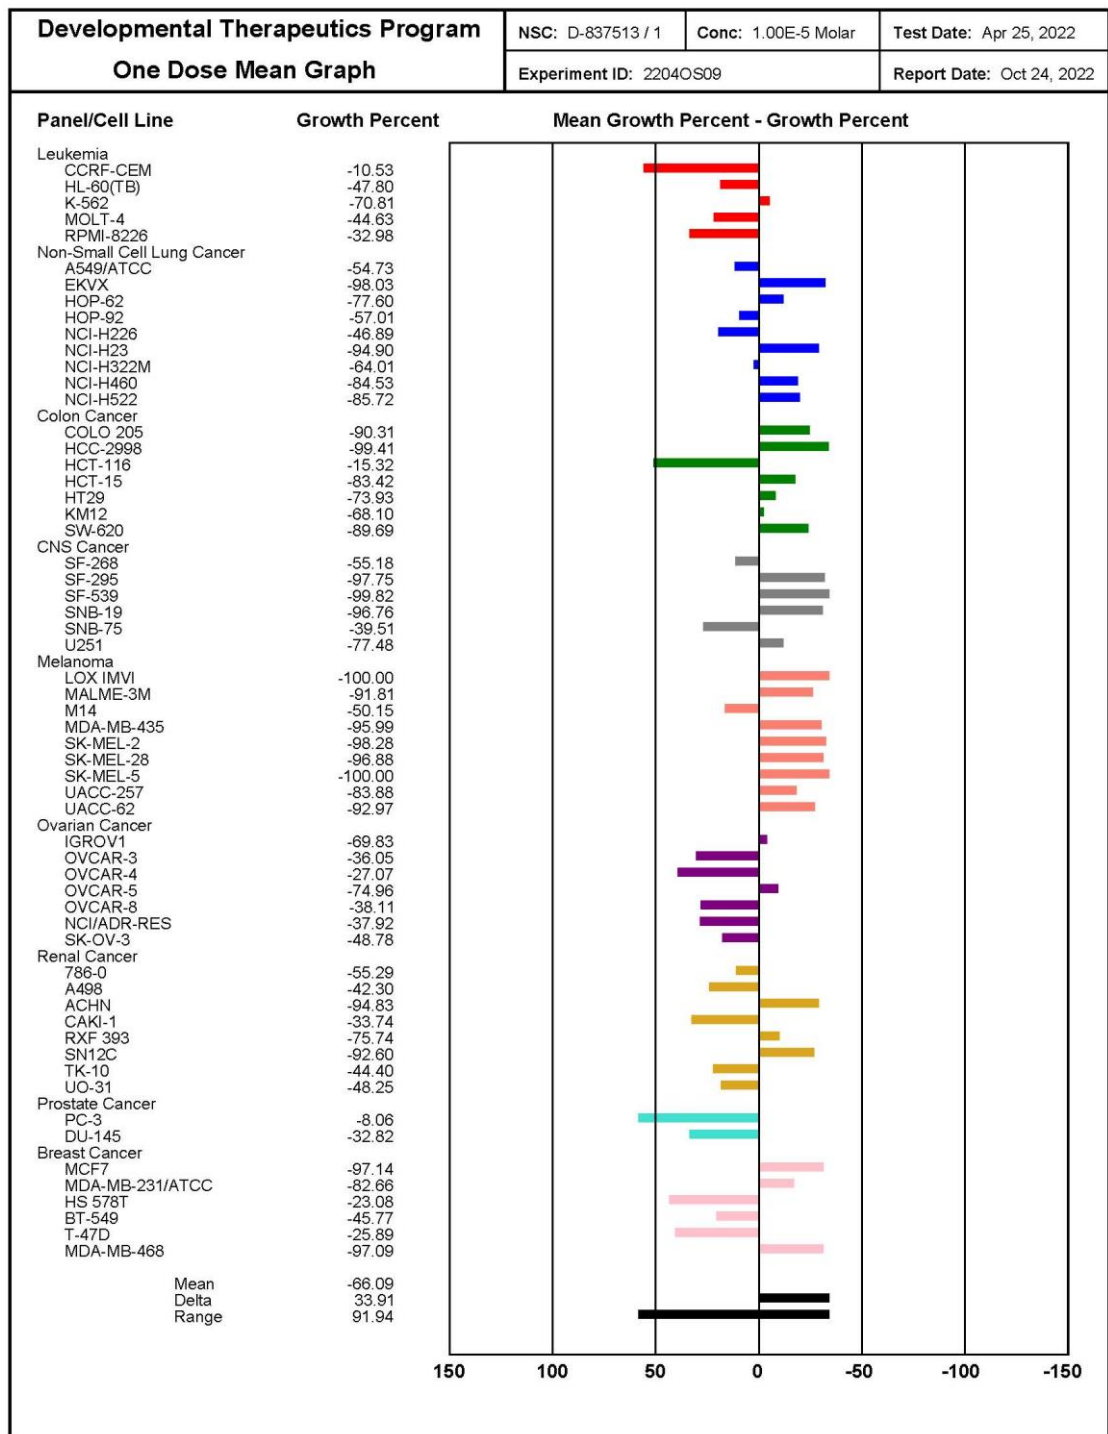

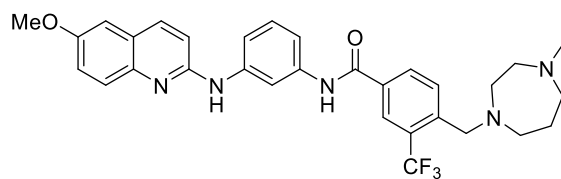

HJ\_2-33 = 2-47 (16b)

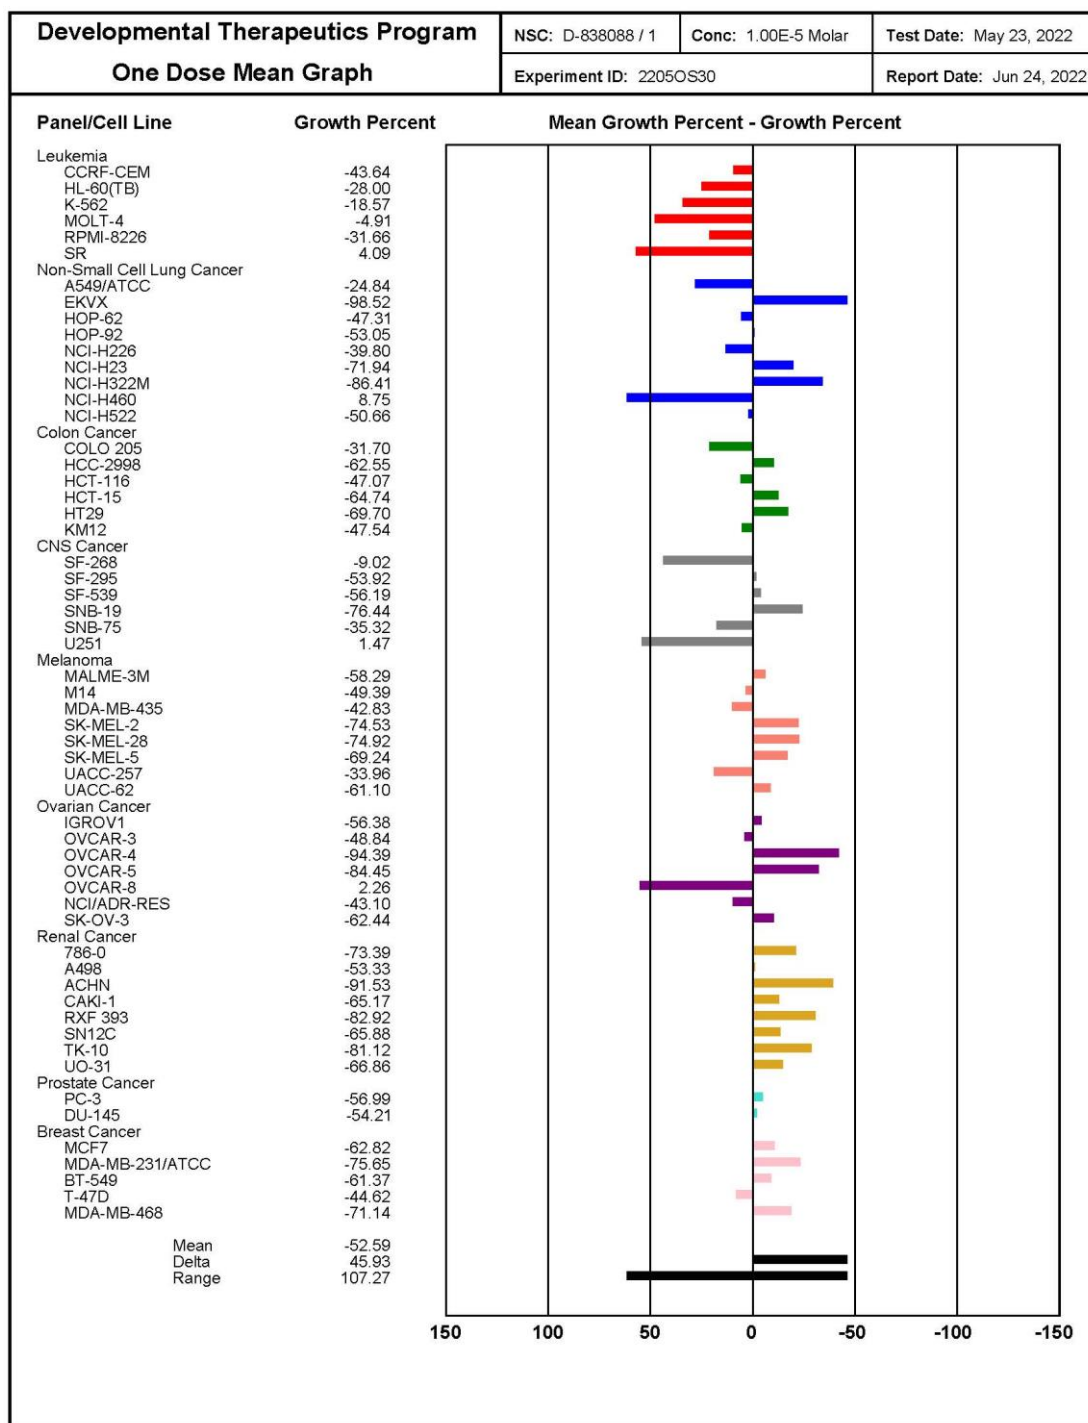

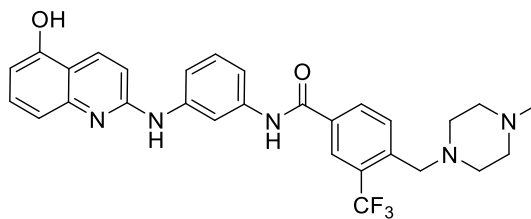

HJ\_2-14 (17a)

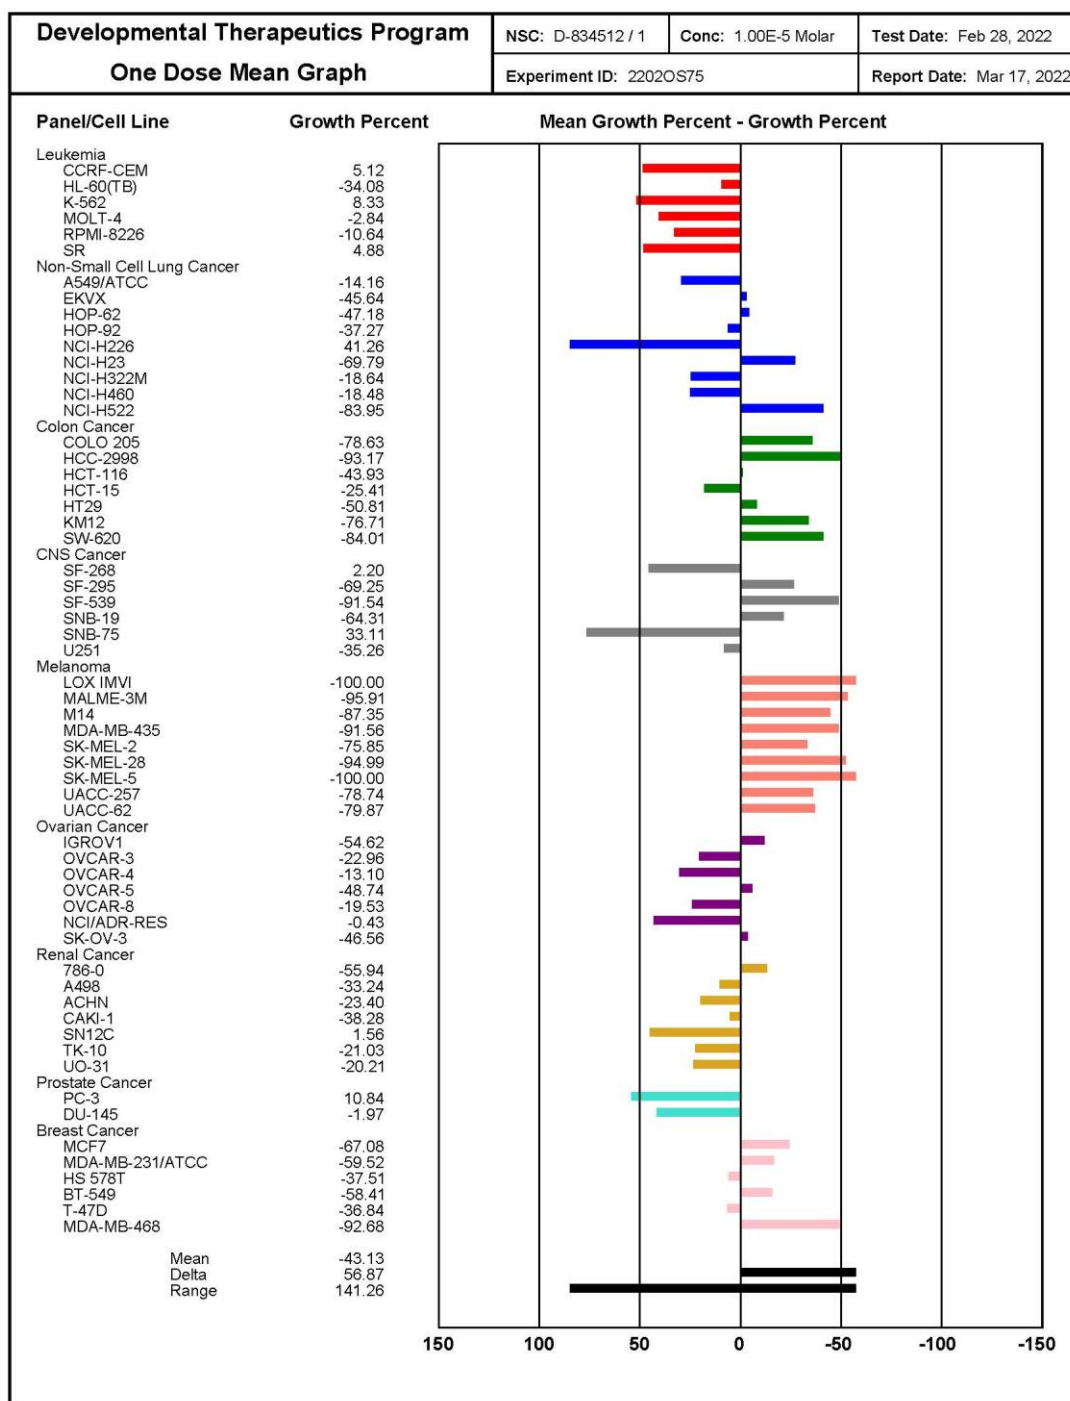

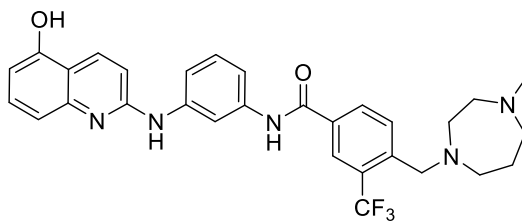

HJ\_2-12 (17b)

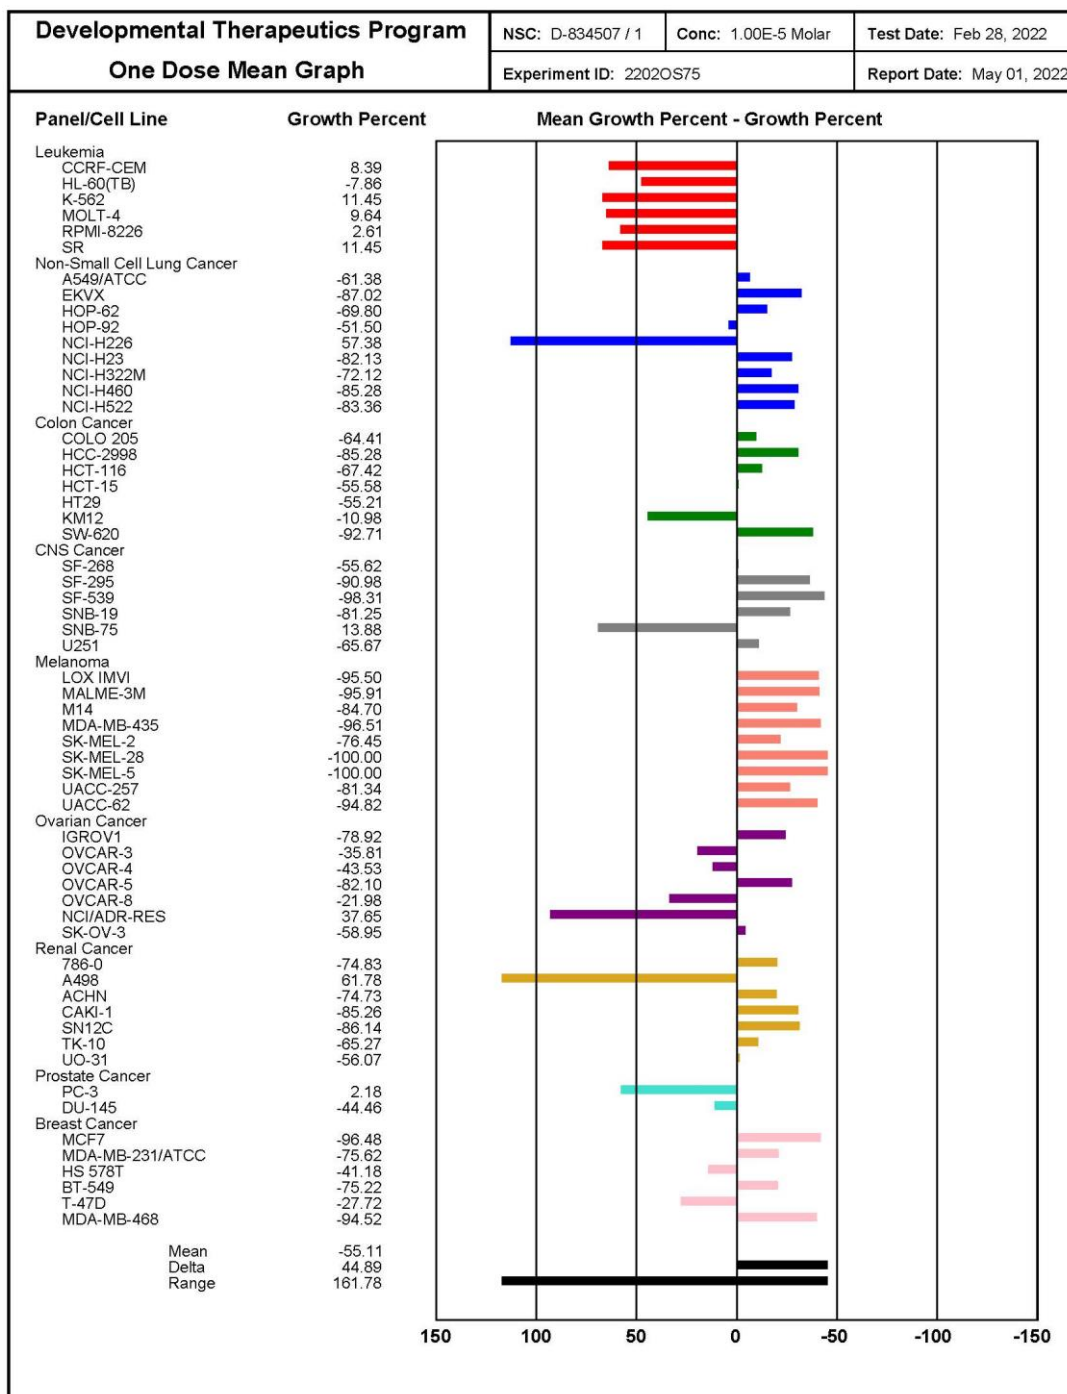

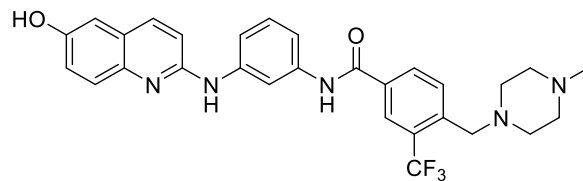

HJ\_2-56 (18a)

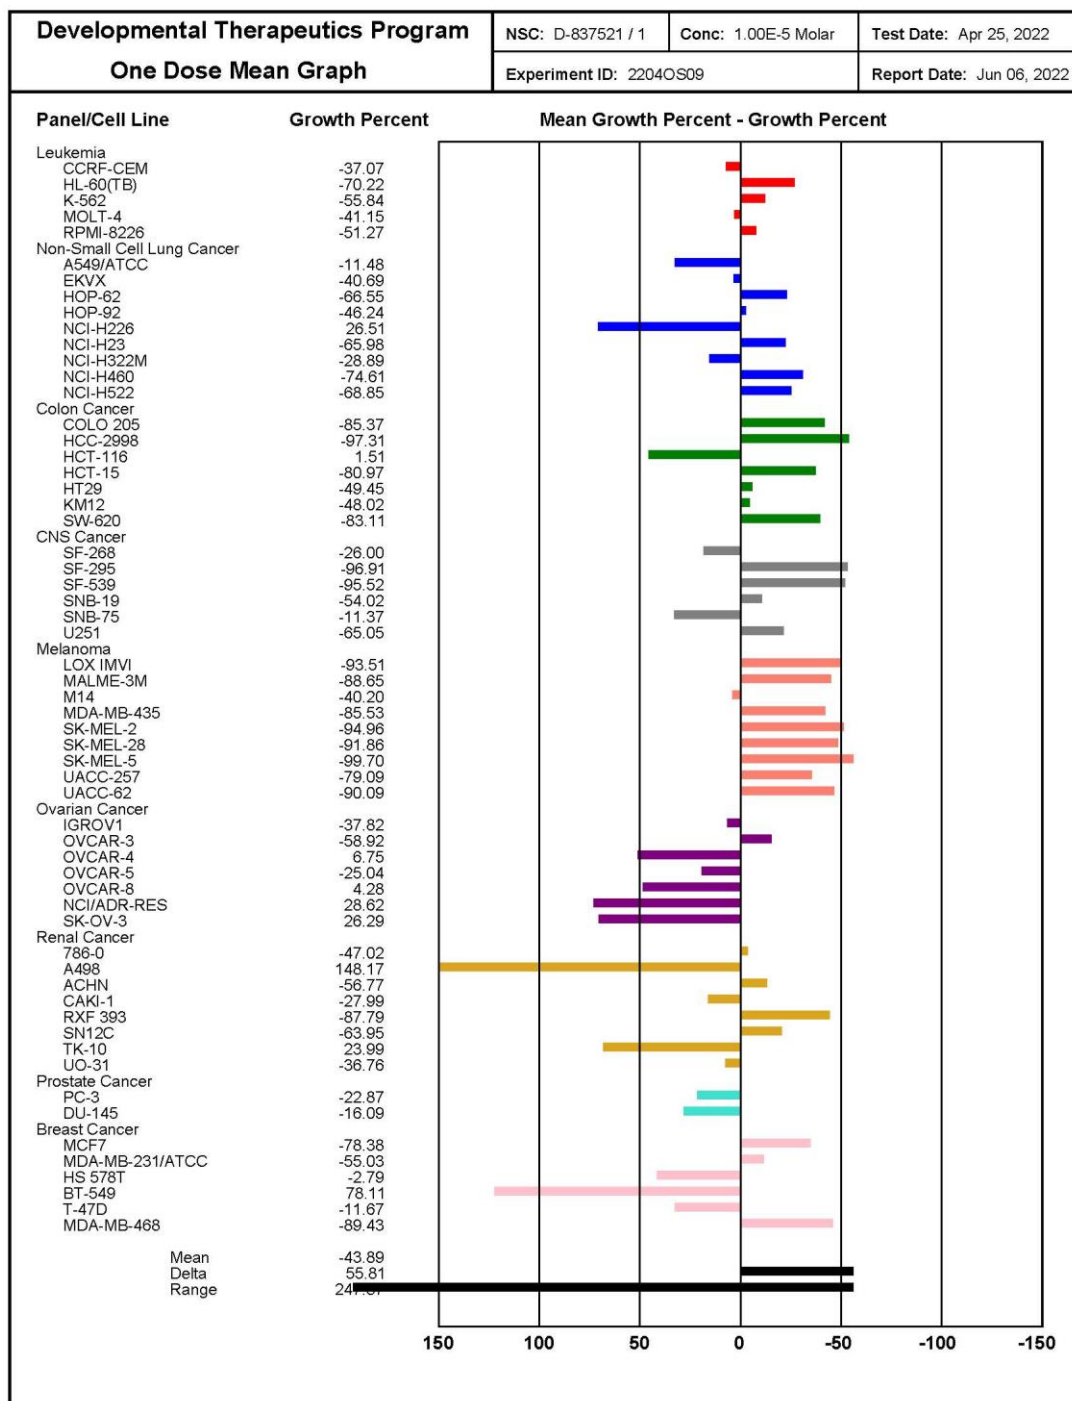

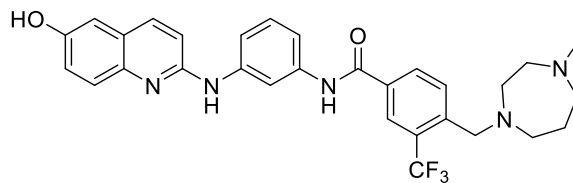

HJ\_2-57 (18b)

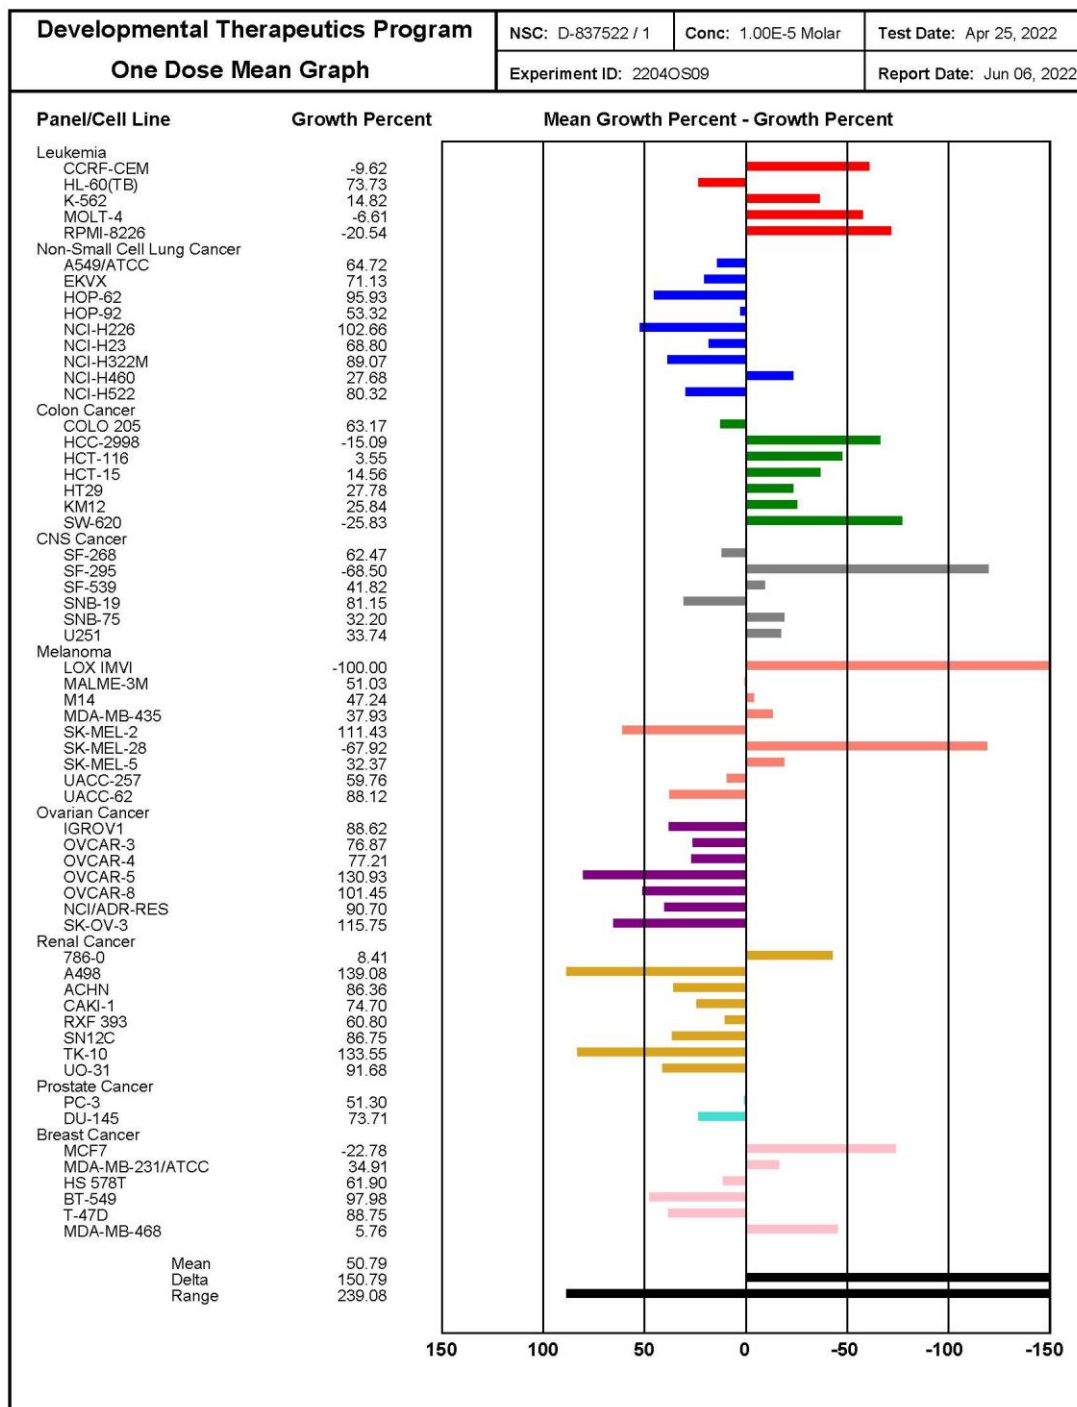



## 5) Molecular docking

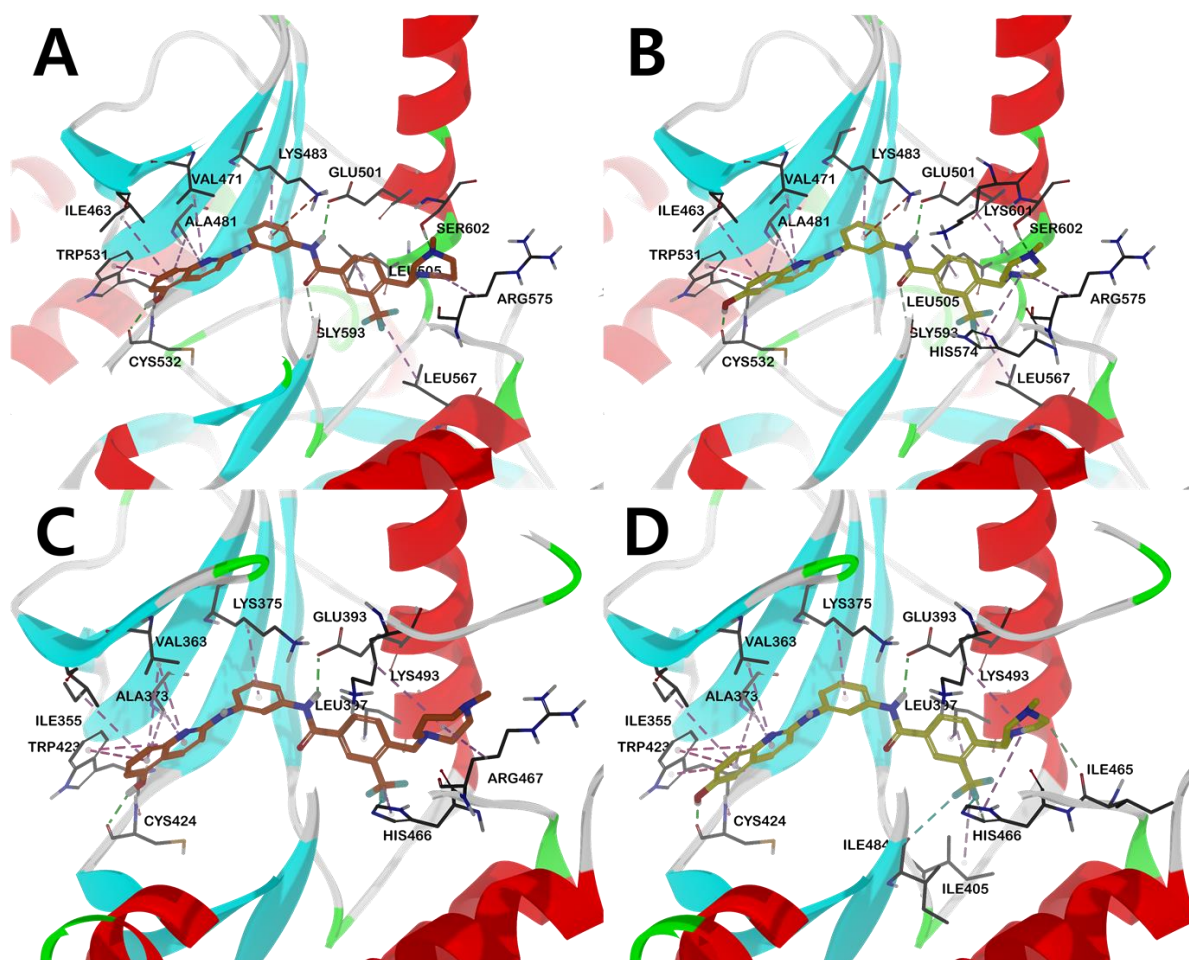

**Figure S1.** The binding mode of compounds (A) **17b** and (B) **18a** in the catalytic kinase domain of B-RAF<sup>V600E</sup> model. The binding mode of compound (C) **17b** and (D) **18a** in the C-RAF homology model. For clarity purpose, the residues showing interactions were shown. Compounds **17b** and **18a** are shown in orange and yellow colored stick model. Binding interactions are shown in various colored dashes lines, crucial hydrogen bonding shown in green dashes lines.



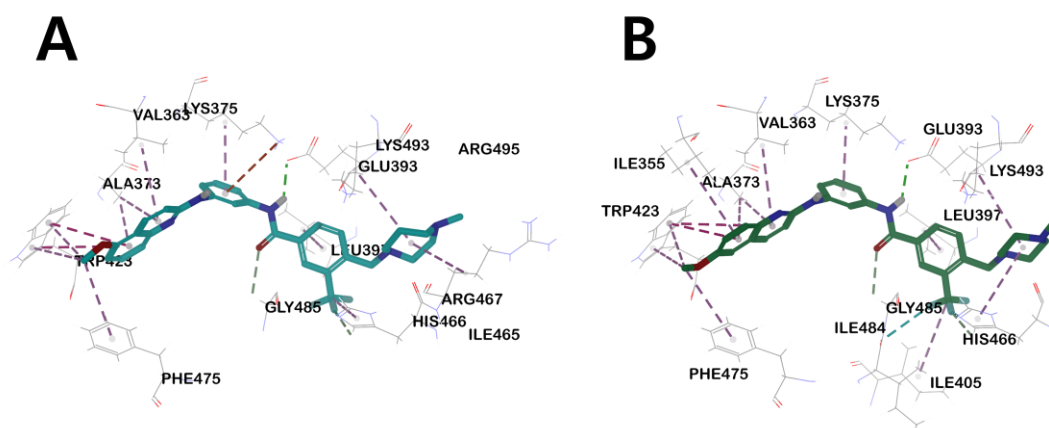

**Figure S2.** Binding model of compounds (A) **14b** and (B) **16a** in the C-Raf homology model. Compounds **14b** and **16a** shown by sky-blue and green colored stick model, respectively. The surrounding residues were shown as line model and various interactions shown as dashes line.

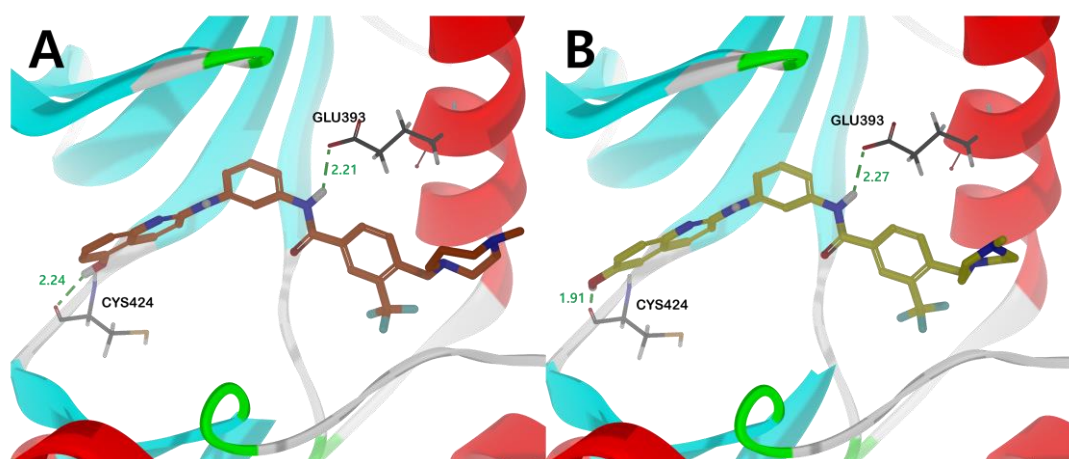

**Figure S3.** Binding model of compounds (A) **17b** and (B) **18a** in the C-Raf homology model. For clarity purpose, only key residues showing interactions were shown. Compounds **17b** and **18a** are shown in orange and yellow colored stick model. Key hydrogen bonding interactions are shown in green dashes. The number near the dashes indicates the bonding distance, in units of Å.

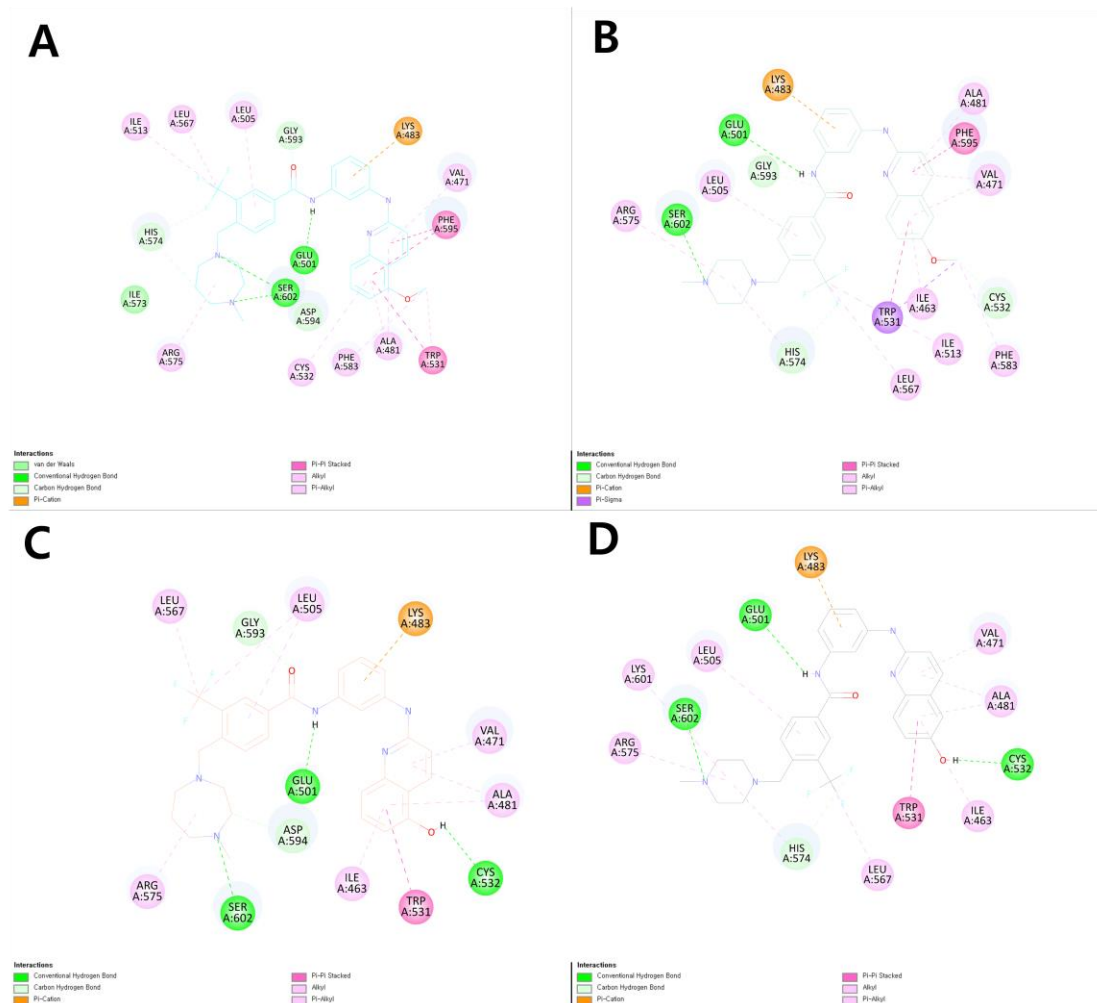

**Figure S4.** 2D binding mode of compound (A) **14b**, (B) **16a**, (C) **17b** and (D) **18a** with B-Raf<sup>V600E</sup>. Various interactions are depicted by different color legends. The inhibitors are shown by line, interacting residues by colored sphere, and interactions by dash lines.

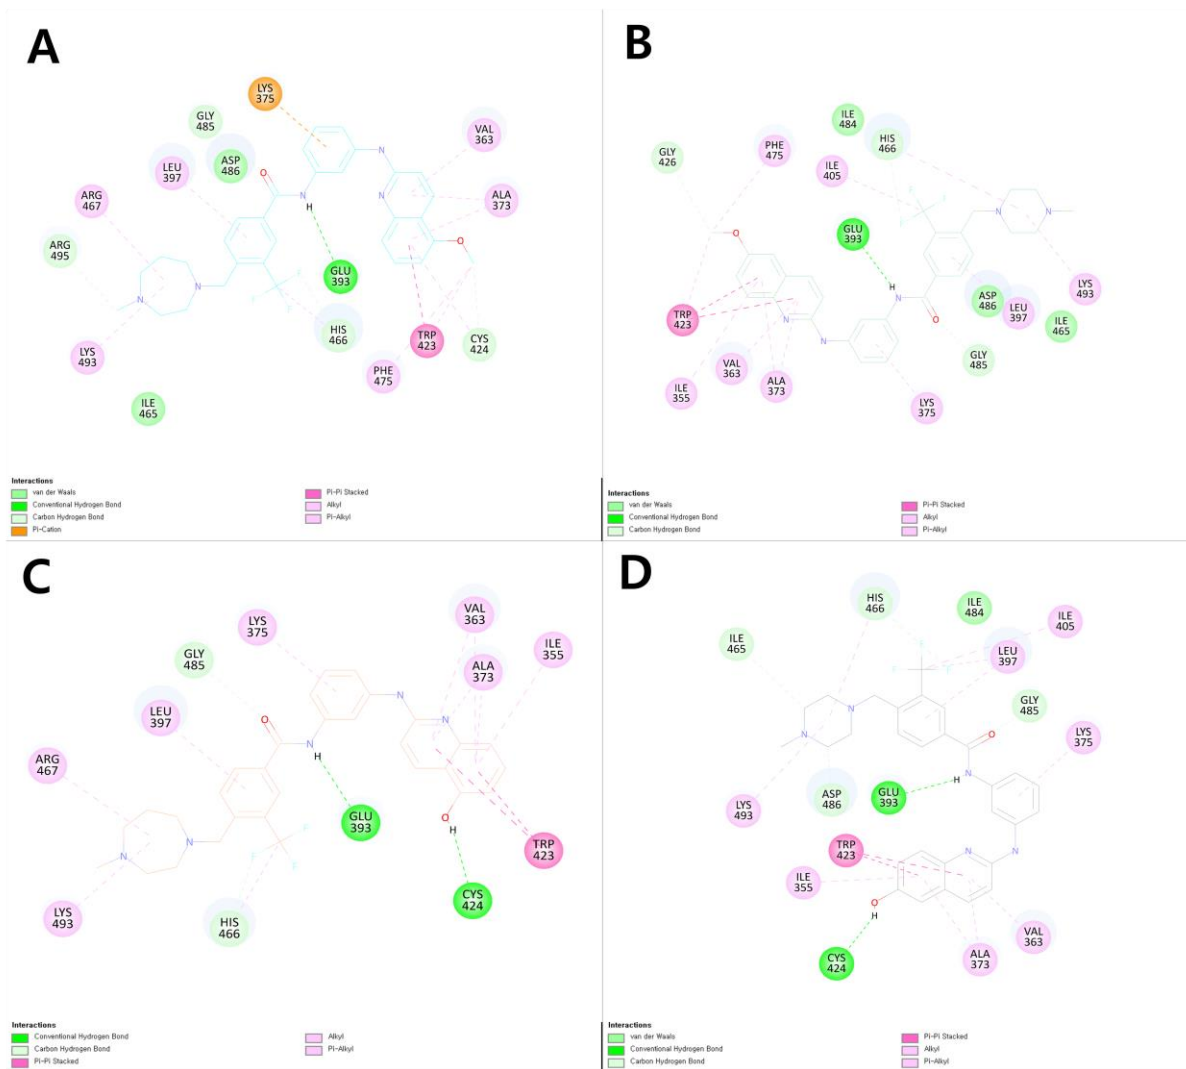

**Figure S5.** 2D binding mode of compounds (A) **14b**, (B) **16a**, (C) **17b** and (D) **18a** with C-RAF homology model. Various interactions are depicted by different color legends. Inhibitors are shown by line, interacting residues by colored sphere, and interactions by dash lines.

## 6) Molecular dynamics

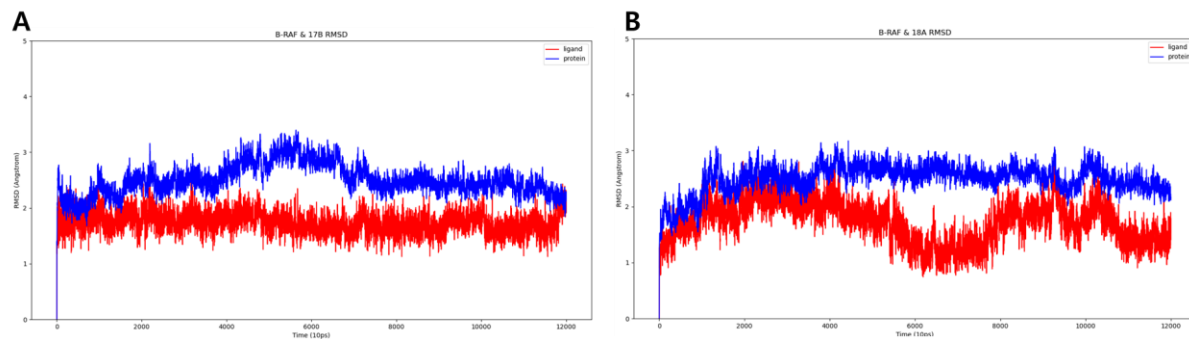

**Figure S6.** RMSD values of (A) **17b** and (B) **18a** compounds bounded B-RAF<sup>V600E</sup> protein during 120 ns of molecular dynamics simulation.

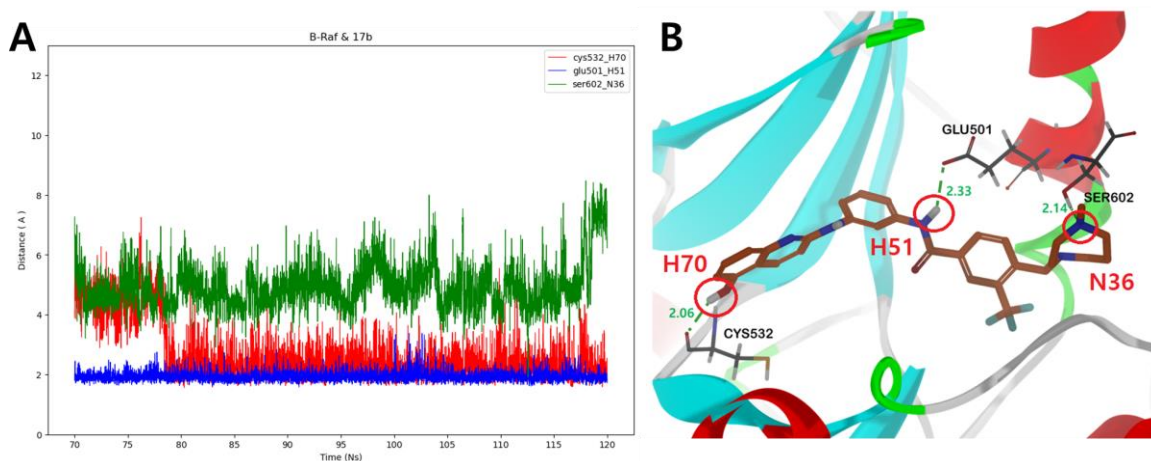

**Figure S7.** (A) Distance of three key hydrogen bonding interaction between B-RAF<sup>V600E</sup> protein and **17b** during 70-120 ns dynamics simulation. The distances between Cys532 and H70, Glu501 and H51, and Ser602 and N36 are marked in red, blue, and green, respectively. (B) Initial binding structure of **17b** and B-RAF<sup>V600E</sup> used in dynamics simulation. Atoms participating in three hydrogen bonding bonds whose distances are monitored are marked with red circles.

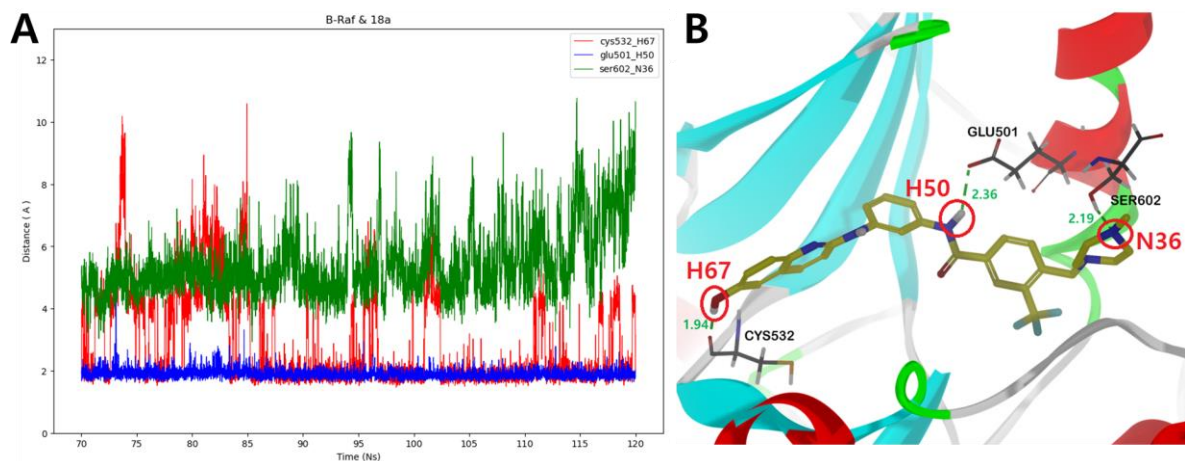

**Figure S8.** (A) Distance of three key hydrogen bonding interaction between B-Raf<sup>V600E</sup> protein and **18a** during 70-120 ns dynamics simulation. The distances between Cys532 and H67, Glu501 and H50, and Ser602 and N36 are marked in red, blue, and green, respectively. (B) Initial binding structure of **18a** and B-Raf<sup>V600E</sup> used in dynamics simulation. Atoms participating in three hydrogen bonding bonds whose distances are monitored are marked with red circle.
